# Supplementary material
Source: publisher figshare collection journal article supplement (https://acs.figshare.com/ndownloader/files/13669664)
Supplement: Supplementary file 1 [file 13669664]

## Sheet: all targeted peptides
Uniprot	Protein Gene	Peptide Modified Sequence	ratio-F (H/L)	ratio-R (L/H)	ratio-Avg.
P30520	ADSS	GK[+281.2]GLEGWEK	1.05152	0.6397	0.845612		Forward: SW620(H)/SW480(L)
P30520	ADSS	K[+281.2]GIGPVYSSK	1.40627	0.8722	1.13924		Reverse: SW620(L)/SW480(H)
P30520	ADSS	AFK[+281.2]ELPVNAQNYVR	1.24116	1.3476	1.29438
	ADSS Average		1.23298	0.953167	1.09308		p-loop
Q8N142	ADSSL1	GK[+281.2]VVDLLATDADIISR					not unique
Q8N142	ADSSL1	K[+281.2]GIGPTYSSK
Q8N142	ADSSL1	WVGVGK[+281.2]SR	0.616371	0.6167	0.616535
	ADSSL1 Average		0.616371	0.6167	0.616535
Q9UPQ3	AGAP1	K[+281.2]STSNFK
	AGAP1 Average
Q99490	AGAP2	QSFLLK[+281.2]R
	AGAP2 Average
Q96P47	AGAP3	AIPIK[+281.2]QGILLK
Q96P47	AGAP3	QGILLK[+281.2]R	3.97298	3.2328	3.60289
	AGAP3 Average		3.97298	3.2328	3.60289
Q9UIJ7	AK3	AVIM[+16]GAPGSGK[+281.2]GTVSSR	0.537519	0.488	0.512759
Q9UIJ7	AK3	AVIMGAPGSGK[+281.2]GTVSSR	0.76558	0.5667	0.66614
Q9UIJ7	AK3	LK[+281.2]AYEDQTKPVLEYYQK
	AK3 Average		0.651549	0.52735	0.58945
P27144	AK4	AVILGPPGSGK[+281.2]GTVC[+57]QR	0.349052	0.5838	0.466426
P27144	AK4	QYIEK[+281.2]SLLVPDHVITR
P27144	AK4	DVAK[+281.2]PVIELYK	0.525901	0.6801	0.603
	AK4 Average		0.437476	0.63195	0.534713
P08133	ANXA6	YELTGK[+281.2]FER	0.191186	0.2468	0.218993
P08133	ANXA6	GTVRPANDFNPDADAK[+281.2]ALR	0.134673	0.1599	0.147286
P08133	ANXA6	GAGTDEK[+281.2]TLTR
	ANXA6 Average		0.16293	0.20335	0.18314
P84077	ARF1	QDLPNAM[+16]NAAEITDK[+281.2]LGLHSLR
P84077	ARF1	QDLPNAMNAAEITDK[+281.2]LGLHSLR
	ARF1 Average
P18085	ARF4	IQEVADELQK[+281.2]M[+16]LLVDELR
P18085	ARF4	IQEVADELQK[+281.2]MLLVDELR
P18085	ARF4	QDLPNAM[+16]AISEMTDK[+281.2]LGLQSLR
	ARF4 Average
P84085	ARF5	ILM[+16]VGLDAAGK[+281.2]TTILYK
	ARF5 Average
P62330	ARF6	VLSK[+281.2]IFGNK
P62330	ARF6	LK[+281.2]LGQSVTTIPTVGFNVETVTYK
P62330	ARF6	LGQSVTTIPTVGFNVETVTYK[+281.2]NVK
P62330	ARF6	NVK[+281.2]FNVWDVGGQDK
P62330	ARF6	QDLPDAMK[+281.2]PHEIQEK
P62330	ARF6	QDLPDAM[+16]K[+281.2]PHEIQEK
	ARF6 Average
P53365	ARFIP2	GIAGEK[+281.2]FDIVK
P53365	ARFIP2	GIAGEK[+281.2]FDIVKK
P53365	ARFIP2	TMEDTLMTVK[+281.2]QYEAAR
P53365	ARFIP2	TM[+16]EDTLMTVK[+281.2]QYEAAR
P53365	ARFIP2	FLEENK[+281.2]IK
	ARFIP2 Average
Q9NRY4	ARHGAP35	AAATK[+281.2]LASAEK	0.761499	1.0418	0.901649
Q9NRY4	ARHGAP35	FVSNLYNQLAK[+281.2]TK
Q9NRY4	ARHGAP35	NINEK[+281.2]QISQVLK
	ARHGAP35 Average		0.761499	1.0418	0.901649
Q13017	ARHGAP5	STNLQPYIK[+281.2]R
Q13017	ARHGAP5	SK[+281.2]KPVIIAATK	0.392449	0.9436	0.668025
Q13017	ARHGAP5	TIEAGIGK[+281.2]NPR	1.49544	1.6353	1.56537
Q13017	ARHGAP5	SK[+281.2]TLFSK
Q13017	ARHGAP5	TK[+281.2]NFNPPTR
	ARHGAP5 Average		0.943944	1.28945	1.1167
Q12774	ARHGEF5	K[+281.2]ALVSSESYLQR
Q12774	ARHGEF5	GEK[+281.2]C[+57]EM[+16]K
	ARHGEF5 Average
P40616	ARL1	IGISK[+281.2]SELVAM[+16]LEEEELRK
P40616	ARL1	IGISK[+281.2]SELVAM[+16]LEEEELR
P40616	ARL1	IGISK[+281.2]SELVAMLEEEELRK
P40616	ARL1	K[+281.2]AILVVFANK
P40616	ARL1	WQIFK[+281.2]TSATK
	ARL1 Average
P36404	ARL2	GLLTILKK[+281.2]
P36404	ARL2	LLM[+16]LGLDNAGK[+281.2]TTILK
P36404	ARL2	LLMLGLDNAGK[+281.2]TTILK
P36404	ARL2	LNIWDVGGQK[+281.2]SLR	3.99042	1.9257	2.95806
	ARL2 Average		3.99042	1.9257	2.95806
P36405	ARL3	K[+281.2]LKSAPDQEVR
P36405	ARL3	LK[+281.2]SAPDQEVR
P36405	ARL3	ILLLGLDNAGK[+281.2]TTLLK
P36405	ARL3	TTLLK[+281.2]QLASEDISHITPTQGFNIK
P36405	ARL3	QLASEDISHITPTQGFNIK[+281.2]SVQSQGFK
	ARL3 Average
P56559	ARL4C	VTK[+281.2]FAENQGTPLLVIANK
	ARL4C Average
Q9H0F7	ARL6	EELDTLLNHPDIK[+281.2]HR
	ARL6 Average
Q96BM9	ARL8A	ITK[+281.2]GNVTIK
Q96BM9	ARL8A	EK[+281.2]DNIDITLQWLIQHSK
	ARL8A Average
Q9NVJ2	ARL8B	KVTK[+281.2]GNVTIK
Q9NVJ2	ARL8B	VTK[+281.2]GNVTIK
Q9NVJ2	ARL8B	DLPNALDEK[+281.2]QLIEK
Q9NVJ2	ARL8B	QLIEK[+281.2]M[+16]NLSAIQDR
	ARL8B Average
Q8WXF7	ATL1	K[+281.2]AGPVQVLIVK
Q8WXF7	ATL1	LK[+281.2]VSGNQHEELQNVR
Q8WXF7	ATL1	LK[+281.2]EIDDEFIK
	ATL1 Average
Q8NHH9	ATL2	LQVK[+281.2]QNQHEELQNVR
Q8NHH9	ATL2	LK[+281.2]DIDEDFKR
Q8NHH9	ATL2	EVAIK[+281.2]QFR
	ATL2 Average
Q6DD88	ATL3	LQVK[+281.2]EHQHEEIQNVR
Q6DD88	ATL3	LK[+281.2]DIAGEFK
Q6DD88	ATL3	AYIK[+281.2]IYQGEDLPHPK
Q6DD88	ATL3	M[+16]GGK[+281.2]DFSFR
Q6DD88	ATL3	MGGK[+281.2]DFSFR
	ATL3 Average
Q14692	BMS1	TPLEPPPIVVVVM[+16]GPPK[+281.2]VGK
Q14692	BMS1	VGK[+281.2]STLIQC[+57]LIR
Q14692	BMS1	GPVTIVSGKK[+281.2]
Q14692	BMS1	LK[+281.2]LTGFPYK
Q14692	BMS1	ANK[+281.2]DSLYKPILR
	BMS1 Average
P60953	CDC42	C[+57]VVVGDGAVGK[+281.2]TC[+57]LLISYTTNK
P60953	CDC42	NK[+281.2]QKPITPETAEK	1.68748	1.4313	1.55939
P60953	CDC42	QK[+281.2]PITPETAEK	1.62946	1.7331	1.68128
P60953	CDC42	AVK[+281.2]YVEC[+57]SALTQK	0.716897	0.8792	0.798049
	CDC42 Average		1.34461	1.34787	1.34624
P53355	DAPK1	K[+281.2]ASAVNMEK
	DAPK1 Average
Q05193	DNM1	K[+281.2]FFLSHPSYR
Q05193	DNM1	K[+281.2]LQQYPR
Q05193	DNM1	K[+281.2]YM[+16]LSVDNLK	1.2987	2.38	1.83935
Q05193	DNM1	K[+281.2]YMLSVDNLK	1.30039	1.521	1.4107
	DNM1 Average		1.29955	1.9505	1.62502
O00429	DNM1L	SQLDINNK[+281.2]K	1.11111	1.82	1.46556
O00429	DNM1L	GM[+16]LK[+281.2]TSK
O00429	DNM1L	TSK[+281.2]AEELLAEEK
	DNM1L Average		1.11111	1.82	1.46556
P50570	DNM2	SQK[+281.2]DIEGK
P50570	DNM2	SK[+281.2]LQSQLLSLEK
P50570	DNM2	EISYAIK[+281.2]NIHGVR
P50570	DNM2	NVYK[+281.2]DLR	1.88324	1.4987	1.69097
	DNM2 Average		1.88324	1.4987	1.69097
Q9UQ16	DNM3	K[+281.2]LANFPR
	DNM3 Average
Q9Y295	DRG1	ELITPK[+281.2]GGGGGGPGEGFDVAK
Q9Y295	DRG1	K[+281.2]IIENELEGFGIR	1.49254	0.87	1.18127
Q9Y295	DRG1	LNSKPPNIGFK[+281.2]K
Q9Y295	DRG1	SILAEYK[+281.2]IHNADVTLR
	DRG1 Average		1.49254	0.87	1.18127
P55039	DRG2	ISEIEK[+281.2]EIAR
P55039	DRG2	AQLLEPSK[+281.2]SASSK	1.40845	1.1	1.25423
	DRG2 Average		1.40845	1.1	1.25423
Q5VTE0	EEF1A1P5	THINIVVIGHVDSGK[+281.2]STTTGHLIYK
Q5VTE0	EEF1A1P5	VETGVLK[+281.2]PGM[+16]VVTFAPVNVTTEVK	1.84604	2.0049	1.92547
Q5VTE0	EEF1A1P5	VETGVLK[+281.2]PGMVVTFAPVNVTTEVK	1.27226	1.7455	1.50888
Q5VTE0	EEF1A1P5	KLEDGPK[+281.2]FLK
Q5VTE0	EEF1A1P5	AAGAGK[+281.2]VTK	1.1798	1.2305	1.20515
	EEF1A1P5 Average		1.4327	1.6603	1.5465
Q05639	EEF1A2	EVSAYIK[+281.2]K	1.27502	1.0653	1.17016
Q05639	EEF1A2	QTVAVGVIK[+281.2]NVEK	1.08731	0.6517	0.869506
	EEF1A2 Average		1.18117	0.8585	1.01983
P13639	EEF2	NM[+16]SVIAHVDHGK[+281.2]STLTDSLVC[+57]K
P13639	EEF2	FSK[+281.2]SATSPEGK	1.11396	1.1345	1.12423
P13639	EEF2	LIEK[+281.2]LDIK	0.813008	0.98	0.896504
	EEF2 Average		0.963483	1.05725	1.01037
P57772	EEFSEC	VNVNVGVLGHIDSGK[+281.2]TALAR
P57772	EEFSEC	GPLQTK[+281.2]AK	1.07805	1.0232	1.05063
P57772	EEFSEC	HK[+281.2]HGLVER	1.08625	1.3431	1.21467
	EEFSEC Average		1.08215	1.18315	1.13265
Q7Z2Z2	EFL1	IYSQK[+281.2]IGIK
Q7Z2Z2	EFL1	K[+281.2]IFVLGPK
Q7Z2Z2	EFL1	ETITKPPK[+281.2]VDMVNEEIGK
Q7Z2Z2	EFL1	ETITKPPK[+281.2]VDM[+16]VNEEIGK
	EFL1 Average
Q15029	EFTUD2	LIK[+281.2]HAVQER
Q15029	EFTUD2	K[+281.2]APTSSSQR	1.03093	1.27	1.15046
Q15029	EFTUD2	K[+281.2]LGEFFQTK
	EFTUD2 Average		1.03093	1.27	1.15046
Q9H4M9	EHD1	K[+281.2]KEPELFQTVAEGLR	0.943396	1.27	1.1067
Q9H4M9	EHD1	K[+281.2]KELVNNLGEIYQK
Q9H4M9	EHD1	SK[+281.2]LPNTVLGK
	EHD1 Average		0.943396	1.27	1.1067
Q9NZN4	EHD2	TVTSALK[+281.2]ELYR
Q9NZN4	EHD2	TK[+281.2]LLPLEEHYR
Q9NZN4	EHD2	K[+281.2]LNPFGNTFLNR
Q9NZN4	EHD2	VVLNK[+281.2]ADMVETQQLM[+16]R
	EHD2 Average
Q9NZN3	EHD3	SK[+281.2]LLPLEEHYR
Q9NZN3	EHD3	K[+281.2]KELVNNLAEIYGR
Q9NZN3	EHD3	EHQISPGDFPNLK[+281.2]R
	EHD3 Average
Q9H223	EHD4	VVLNK[+281.2]ADQVDTQQLMR	0.990491	0.6365	0.813496
Q9H223	EHD4	DIQSLPQK[+281.2]AAVR
Q9H223	EHD4	ISGVNAK[+281.2]K	1.44928	1.4335	1.44139
	EHD4 Average		1.21988	1.035	1.12744
P49770	EIF2B2	PGSAAK[+281.2]GSELSER
P49770	EIF2B2	IESFVETLK[+281.2]R
P49770	EIF2B2	TVEAFLK[+281.2]EAAR
P49770	EIF2B2	VIIGTK[+281.2]TILANGALR
	EIF2B2 Average
P41091	EIF2S3	SC[+57]GSSTPDEFPTDIPGTK[+281.2]GNFK	1.03295	1.35	1.19148
P41091	EIF2S3	GNFK[+281.2]LVR	0.920895	1.1064	1.01365
P41091	EIF2S3	IDLVK[+281.2]ESQAK	1.25	1.1142	1.1821
	EIF2S3 Average		1.06795	1.1902	1.12907
P55010	EIF5	K[+281.2]FVLC[+57]PEC[+57]ENPETDLHVNPK
P55010	EIF5	K[+281.2]QTIGNSC[+57]K	0.847458	0.8197	0.833579
P55010	EIF5	YVSK[+281.2]ELAK	0.714337	0.728	0.721168
	EIF5 Average		0.780897	0.77385	0.777374
O60841	EIF5B	EQEPQK[+281.2]SK	1.13173	1.0963	1.11402
O60841	EIF5B	APIIC[+57]VLGHVDTGKTK[+281.2]	0.878735	0.9097	0.894217
O60841	EIF5B	KSPDSDVAATLK[+281.2]K	1.0101	0.74	0.875051
	EIF5B Average		1.00686	0.915333	0.961095
O75616	ERAL1	VVLLGAPNAGK[+281.2]STLSNQLLGR	0.666667	1.92	1.29333
O75616	ERAL1	K[+281.2]VFPVSR
O75616	ERAL1	ETQVILLDTPGIISPGK[+281.2]QK
O75616	ERAL1	LLVPK[+281.2]ESYVK
	ERAL1 Average		0.666667	1.92	1.29333
Q02790	FKBP4	GEHSIVYLK[+281.2]PSYAFGSVGK	0.749008	1.2141	0.981554
Q02790	FKBP4	GTVYFK[+281.2]EGK	1.14364	0.9867	1.06517
Q02790	FKBP4	VLQLYPNNKAAK[+281.2]	1.74764	0.6557	1.20167
	FKBP4 Average		1.21343	0.952167	1.0828
O14772	FPGT	FLHK[+281.2]PSIEK
O14772	FPGT	YATM[+16]AFGVQDNLK[+281.2]K	5.02765	1.942	3.48483
O14772	FPGT	YATMAFGVQDNLK[+281.2]K	1.92308	1.23	1.57654
	FPGT Average		3.47536	1.586	2.53068
P32455	GBP1	K[+281.2]GFSLGSTVQSHTK
P32455	GBP1	GFSLGSTVQSHTK[+281.2]
P32455	GBP1	K[+281.2]GTSQKDETFNLPR
P32455	GBP1	KGTSQK[+281.2]DETFNLPR
P32455	GBP1	DVDHLFQK[+281.2]ELAAQLEK
P32455	GBP1	EGFQK[+281.2]ESR
	GBP1 Average
P32456	GBP2	TGK[+281.2]SYLM[+16]NK
P32456	GBP2	TGK[+281.2]SYLMNK
P32456	GBP2	NGFSLGSTVK[+281.2]SHTK
P32456	GBP2	KGIQAK[+281.2]EVLK
P32456	GBP2	KGIQAK[+281.2]EVLK
	GBP2 Average
Q96PP9	GBP4	TGK[+281.2]SYLMNR
Q96PP9	GBP4	TGK[+281.2]SYLM[+16]NR
	GBP4 Average
P30793	GCH1	QVLGLSK[+281.2]LAR
	GCH1 Average
Q96RP9	GFM1	NIGISAHIDSGK[+281.2]TTLTER	0.679763	0.61	0.644882
Q96RP9	GFM1	SFTPVFLGSALK[+281.2]NK	0.486855	0.8136	0.650227
Q96RP9	GFM1	FSK[+281.2]GIGR	0.964227	0.6073	0.785764
Q96RP9	GFM1	K[+281.2]QSGGAGQYGK	0.723118	0.7412	0.732159
	GFM1 Average		0.713491	0.693025	0.703258
Q969S9	GFM2	NIGIM[+16]AHIDAGK[+281.2]TTTTER
Q969S9	GFM2	VTLAQTAVPVLC[+57]GSALK[+281.2]NK
Q969S9	GFM2	DDLC[+57]ALAFK[+281.2]VLHDK
Q969S9	GFM2	HTATGDTIVSSK[+281.2]SSALAAAR
	GFM2 Average
Q9UG22	GIMAP2	LGSQTLTK[+281.2]TC[+57]SK
	GIMAP2 Average
Q9NUV9	GIMAP4	K[+281.2]LAEQEAHYAVR
	GIMAP4 Average
Q96F15	GIMAP5	IILVGK[+281.2]TGC[+57]GK
Q96F15	GIMAP5	SATGNSILGQPVFESK[+281.2]LR
	GIMAP5 Average
Q6P9H5	GIMAP6	DVFESK[+281.2]LSTR
Q6P9H5	GIMAP6	LSTRPVTK[+281.2]TSQR
Q6P9H5	GIMAP6	PVTK[+281.2]TSQR
	GIMAP6 Average
Q8NHV1	GIMAP7	IVLVGK[+281.2]TGSGK
Q8NHV1	GIMAP7	IAAQAVTK[+281.2]NC[+57]QK
Q8NHV1	GIMAP7	ESLDTTC[+57]K[+281.2]EISR
Q8NHV1	GIMAP7	SIVK[+281.2]EC[+57]GNR
	GIMAP7 Average
P00367	GLUD1	INPK[+281.2]NYTDNELEK	1.19246	2.2124	1.70243
P00367	GLUD1	FGK[+281.2]HGGTIPIVPTAEFQDR	2.74273	2.103	2.42287
P00367	GLUD1	ISGASEK[+281.2]DIVHSGLAYTM[+16]ER	2.57003	3.7429	3.15647
P00367	GLUD1	ISGASEK[+281.2]DIVHSGLAYTMER	2.9753	3.3619	3.1686
	GLUD1 Average		2.37013	2.85505	2.61259
P49448	GLUD2	GASIVEDK[+281.2]LVK
P49448	GLUD2	INPK[+281.2]NYTENELEK
P49448	GLUD2	INPK[+281.2]NYTENELEK
P49448	GLUD2	FGK[+281.2]HGGTIPIVPTAEFQDSISGASEK
	GLUD2 Average
Q96IJ6	GMPPA	AVILIGGPQK[+281.2]GTR	1.4979	0.7705	1.1342
Q96IJ6	GMPPA	VAPSAVLGPNVSIGK[+281.2]GVTVGEGVR
Q96IJ6	GMPPA	MDSESLFK[+281.2]DGK
Q96IJ6	GMPPA	M[+16]DSESLFK[+281.2]DGK
Q96IJ6	GMPPA	DGK[+281.2]LLPAITILGC[+57]R
	GMPPA Average		1.4979	0.7705	1.1342
Q9Y5P6	GMPPB	VEEPSK[+281.2]YGVVVC[+57]EADTGR	0.658935	0.6553	0.657118
Q9Y5P6	GMPPB	IQLQPTSIEK[+281.2]EVFPIMAK	0.561798	0.82	0.690899
	GMPPB Average		0.610366	0.73765	0.674008
P29992	GNA11	INAEIEK[+281.2]QLR
P29992	GNA11	LLLLGTGESGK[+281.2]STFIK	0.884956	0.75	0.817478
P29992	GNA11	K[+281.2]DLLEDK
	GNA11 Average		0.884956	0.75	0.817478
Q03113	GNA12	ILLLGAGESGK[+281.2]STFLK	2.38095	1.47	1.92548
Q03113	GNA12	ATK[+281.2]GIVEHDFVIK
Q03113	GNA12	GIVEHDFVIK[+281.2]K
Q03113	GNA12	FVFHAVK[+281.2]DTILQENLK
	GNA12 Average		2.38095	1.47	1.92548
Q14344	GNA13	EEFRPTIYSNVIK[+281.2]GM[+16]R
Q14344	GNA13	GIHEYDFEIK[+281.2]NVPFK	2.77778	1.15	1.96389
Q14344	GNA13	DVQK[+281.2]FLVEC[+57]FR
	GNA13 Average		2.77778	1.15	1.96389
P30679	GNA15	LLLLGPGESGK[+281.2]STFIK
P30679	GNA15	LLLLGPGESGK[+281.2]STFIK
	GNA15 Average
P04899	GNAI2	EDGEK[+281.2]AAR
P04899	GNAI2	DLHFK[+281.2]M[+16]FDVGGQR	4.77555	2.9	3.83777
P04899	GNAI2	FEDLNK[+281.2]R	3.0303	3.08	3.05515
	GNAI2 Average		3.90293	2.99	3.44646
P08754	GNAI3	LK[+281.2]IDFGEAAR
	GNAI3 Average
P63092	GNAS	LLLLGAGESGK[+281.2]STIVK	2.27273	3.4	2.83636
P63092	GNAS	LLLLGAGESGK[+281.2]STIVK
P63092	GNAS	NEEK[+281.2]AQR
	GNAS Average		2.27273	3.4	2.83636
P36915	GNL1	SFQDYLGK[+281.2]IHGAYSSEK
P36915	GNL1	TPQDPSSVLKK[+281.2]
P36915	GNL1	K[+281.2]VVSVSR
	GNL1 Average
Q13823	GNL2	VIK[+281.2]QSSLQK
Q13823	GNL2	GVVQVEK[+281.2]IK
Q13823	GNL2	IK[+281.2]SPEDHIGAVLER
Q13823	GNL2	AVIK[+281.2]ALDEK
	GNL2 Average
Q9BVP2	GNL3	EFGLC[+57]K[+281.2]TENK	3.33333	2.04	2.68667
Q9BVP2	GNL3	K[+281.2]LYC[+57]QELK
Q9BVP2	GNL3	K[+281.2]ELPTVVFR
Q9BVP2	GNL3	VGVIGFPNVGK[+281.2]SSIINSLK
	GNL3 Average		3.33333	2.04	2.68667
Q9NVN8	GNL3L	VGVVGLPNVGK[+281.2]SSLINSLK
	GNL3L Average
P15170	GSPT1	SVVAPPGAPKK[+281.2]	0.9993	1.7033	1.3513
P15170	GSPT1	AYFETEKK[+281.2]
P15170	GSPT1	K[+281.2]VGFNPK	1.53445	1.489	1.51172
	GSPT1 Average		1.26687	1.59615	1.43151
Q8IYD1	GSPT2	SK[+281.2]SVIVPSGAPK
Q8IYD1	GSPT2	SVIVPSGAPKK[+281.2]
Q8IYD1	GSPT2	K[+281.2]VGFSPK
	GSPT2 Average
O00178	GTPBP1	VAVVGNVDAGK[+281.2]STLLGVLTHGELDNGR
O00178	GTPBP1	VAVVGNVDAGK[+281.2]STLLGVLTHGELDNGR
O00178	GTPBP1	VITFIDLAGHEK[+281.2]YLK
O00178	GTPBP1	GGQTASFALK[+281.2]K
O00178	GTPBP1	VK[+281.2]SQGAC[+57]VTPASGC[+57]	1.36333	1.1109	1.23711
	GTPBP1 Average		1.36333	1.1109	1.23711
A4D1E9	GTPBP10	M[+16]TLK[+281.2]QLK
A4D1E9	GTPBP10	LLTNFLPLK[+281.2]GQK	0.485437	1.07	0.777718
A4D1E9	GTPBP10	FLK[+281.2]HIER
	GTPBP10 Average		0.485437	1.07	0.777718
Q9BX10	GTPBP2	LK[+281.2]LVNPSQYR
Q9BX10	GTPBP2	ASLK[+281.2]TLHR
Q9BX10	GTPBP2	VAVLGNVDSGK[+281.2]STLLGVLTQGELDNGR
Q9BX10	GTPBP2	TGEK[+281.2]AVVR
Q9BX10	GTPBP2	VGAK[+281.2]LLFR
	GTPBP2 Average
Q9BZE4	GTPBP4	K[+281.2]ITVVPSAK
Q9BZE4	GTPBP4	LALGQINIAK[+281.2]NLVDNVAK
Q9BZE4	GTPBP4	LALGQINIAK[+281.2]NLVDNVAK
Q9BZE4	GTPBP4	NLVDNVAK[+281.2]DYVR
Q9BZE4	GTPBP4	TLLLC[+57]GYPNVGK[+281.2]SSFINK
Q9BZE4	GTPBP4	ADVDVQPYAFTTK[+281.2]SLFVGHM[+16]DYK
Q9BZE4	GTPBP4	ADVDVQPYAFTTK[+281.2]SLFVGHMDYK
Q9BZE4	GTPBP4	GNK[+281.2]VNEVLNR
	GTPBP4 Average
O43824	GTPBP6	GNFEHLTEK[+281.2]IR
O43824	GTPBP6	EFPVISVVGYTNC[+57]GK[+281.2]TTLIK
O43824	GTPBP6	VIISNSAYGK[+281.2]FR
	GTPBP6 Average
Q8N3Z3	GTPBP8	LPK[+281.2]QQLR
Q8N3Z3	GTPBP8	SSK[+281.2]GHLLK
Q8N3Z3	GTPBP8	GHLLK[+281.2]QVLQIQK
	GTPBP8 Average
Q02153	GUCY1B3	GPVSM[+16]K[+281.2]GK
	GUCY1B3 Average
Q8N442	GUF1	NFSIVAHVDHGK[+281.2]STLADR
Q8N442	GUF1	GITVK[+281.2]AQTASLFYNC[+57]EGK
Q8N442	GUF1	AVLSSSK[+281.2]LIK
Q8N442	GUF1	EK[+281.2]EITIINPAQFPDK	1.11819	1.3379	1.22805
	GUF1 Average		1.11819	1.3379	1.22805
Q7Z2Y8	GVINP1	K[+281.2]LINFM[+16]K[+281.2]
	GVINP1 Average
Q9Y450	HBS1L	YEQESK[+281.2]K	1.81159	1.82	1.8158
Q9Y450	HBS1L	LISVLNK[+281.2]STGEVTK	2.32558	1.84	2.08279
Q9Y450	HBS1L	STGEVTK[+281.2]K	1.67336	1.62	1.64668
	HBS1L Average		1.93685	1.76	1.84842
P08238	HSP90AB1	FYEAFSK[+281.2]NLK	1.5625	2.12	1.84125
P08238	HSP90AB1	SIYYITGESK[+281.2]EQVANSAFVER
P08238	HSP90AB1	K[+281.2]HLEINPDHPIVETLR
	HSP90AB1 Average		1.5625	2.12	1.84125
Q9BW83	IFT27	C[+57]ILAGDPAVGK[+281.2]TALAQIFR	1.36986	1.33	1.34993
Q9BW83	IFT27	SQAPGISLPGVLVGNK[+281.2]TDLAGR
	IFT27 Average		1.36986	1.33	1.34993
Q8WZA9	IRGQ	NAGGGGLENALSK[+281.2]GR
Q8WZA9	IRGQ	EK[+281.2]C[+57]SAGSQK
Q8WZA9	IRGQ	C[+57]SAGSQK[+281.2]AGSGEGPGK
	IRGQ Average
P01116	KRAS	TVDTK[+281.2]QAQDLAR
P01116	KRAS	SYGIPFIETSAK[+281.2]TR
	KRAS Average
Q9NS86	LANCL2	IK[+281.2]DLLQQMEEGLK
Q9NS86	LANCL2	IK[+281.2]DLLQQMEEGLK
Q9NS86	LANCL2	SLDYVK[+281.2]R	0.991277	1.3484	1.16984
Q9NS86	LANCL2	VFKEEK[+281.2]YLK
	LANCL2 Average		0.991277	1.3484	1.16984
Q9H089	LSG1	LNIK[+281.2]FVPAEAR	0.943396	0.65	0.796698
Q9H089	LSG1	LHEENK[+281.2]QFLC[+57]IPR
Q9H089	LSG1	VK[+281.2]DGQLTVGLVGYPNVGK
Q9H089	LSG1	YILK[+281.2]DYVSGK
	LSG1 Average		0.943396	0.65	0.796698
Q8IWA4	MFN1	IFFVSAK[+281.2]EVLSAR
	MFN1 Average
O95140	MFN2	GYLSK[+281.2]VR
O95140	MFN2	VYK[+281.2]NELHR
	MFN2 Average
Q8IVH4	MMAA	FVDK[+281.2]LYTGLIQGQR
Q8IVH4	MMAA	K[+281.2]KELAQVLLQK
Q8IVH4	MMAA	GK[+281.2]PLAFR
Q8IVH4	MMAA	VGLSGPPGAGK[+281.2]STFIEYFGK
Q8IVH4	MMAA	VGLSGPPGAGK[+281.2]STFIEYFGK	1.38889	0.64	1.01444
Q8IVH4	MMAA	LSVLAVDPSSC[+57]TSGGSLLGDK[+281.2]TR	2.1777	0.5787	1.3782
Q8IVH4	MMAA	IQAEYVSALK[+281.2]LLR
	MMAA Average		1.78329	0.60935	1.19632
Q9NZB8	MOCS1	LVQQNQLK[+281.2]K
Q9NZB8	MOCS1	K[+281.2]GDALVVAQLAGVQAAK
Q9NZB8	MOCS1	LISK[+281.2]TGGQR
	MOCS1 Average
Q9BT17	MTG1	VLK[+281.2]SVAVK
Q9BT17	MTG1	SVAVK[+281.2]LGK
	MTG1 Average
Q9H4K7	MTG2	VPVGTLVK[+281.2]EGGR
Q9H4K7	MTG2	TVAHAGM[+16]VGFPNAGK[+281.2]SSLLR
	MTG2 Average
P46199	MTIF2	SQLSSTK[+281.2]SK	0.75188	2	1.37594
P46199	MTIF2	SPVVTIM[+16]GHVDHGK[+281.2]TTLLDK
P46199	MTIF2	SPVVTIM[+16]GHVDHGK[+281.2]TTLLDK
P46199	MTIF2	K[+281.2]EQIPLKPK
P46199	MTIF2	IVC[+57]YEEK[+281.2]QIQAK
P46199	MTIF2	IVC[+57]YEEK[+281.2]QIQAK
	MTIF2 Average		0.75188	2	1.37594
P20591	MX1	VAVGNQPADIGYK[+281.2]IK
P20591	MX1	SLPLLENQIK[+281.2]ETHQR
P20591	MX1	KIQK[+281.2]FENQYR
P20591	MX1	IQK[+281.2]FENQYR
P20591	MX1	SK[+281.2]IEDIR
P20591	MX1	EK[+281.2]ELEEEKK
	MX1 Average
P20592	MX2	NTELELQDPGQVEK[+281.2]EIHK
P20592	MX2	LSLAEATKK[+281.2]
P20592	MX2	IK[+281.2]M[+16]FNQDIEK
P20592	MX2	VK[+281.2]NIIHEEVEK
	MX2 Average
Q8N4C6	NIN	IAALK[+281.2]NELR
	NIN Average
P15531	NME1	FM[+16]QASEDLLK[+281.2]EHYVDLK
P15531	NME1	FMQASEDLLK[+281.2]EHYVDLK
P15531	NME1	EHYVDLK[+281.2]DRPFFAGLVK
	NME1 Average
Q14978	NOLC1	SPAVK[+281.2]PAAAPK
Q14978	NOLC1	AAVVVSK[+281.2]SGSLK	0.662252	1.26	0.961126
Q14978	NOLC1	LQTPNTFPK[+281.2]R
	NOLC1 Average		0.662252	1.26	0.961126
P01111	NRAS	TVDTK[+281.2]QAHELAK
P01111	NRAS	QAHELAK[+281.2]SYGIPFIETSAK
	NRAS Average
Q96DE0	NUDT16	AK[+281.2]DHGLEVLGLVR
	NUDT16 Average
P50583	NUDT2	WLGLEEAC[+57]QLAQFK[+281.2]EMK
P50583	NUDT2	WLGLEEAC[+57]QLAQFK[+281.2]EM[+16]K
	NUDT2 Average
Q9NTK5	OLA1	K[+281.2]GGDGIKPPPIIGR
Q9NTK5	OLA1	FDFLC[+57]QYHK[+281.2]PASK	0.775434	0.39	0.582717
Q9NTK5	OLA1	GTK[+281.2]APQAAGK	0.877193	0.7	0.788596
	OLA1 Average		0.826314	0.545	0.685657
O60313	OPA1	IDQLQEELLHTQLK[+281.2]YQR	1.66583	1.0199	1.34287
O60313	OPA1	VVVVGDQSAGK[+281.2]TSVLEM[+16]IAQAR
O60313	OPA1	VVVVGDQSAGK[+281.2]TSVLEMIAQAR	0.671141	0.66	0.66557
O60313	OPA1	IK[+281.2]LLTGK
O60313	OPA1	AAGQYSTSYAQQK[+281.2]R
	OPA1 Average		1.16849	0.83995	1.00422
Q16822	PCK2	VESK[+281.2]TVIVTPSQR	1.33316	1.2711	1.30213
Q16822	PCK2	YVAAAFPSAC[+57]GK[+281.2]	1.00422	0.9433	0.973759
Q16822	PCK2	SESTAAAEHK[+281.2]GK	1.99601	0.9863	1.49115
	PCK2 Average		1.44446	1.0669	1.25568
P61026	RAB10	K[+281.2]TYDLLFK	0.777968	0.848	0.812984
P61026	RAB10	LLLIGDSGVGK[+281.2]TC[+57]VLFR	0.586545	0.8461	0.716322
P61026	RAB10	SFENISK[+281.2]WLR	0.636254	1.5901	1.11318
P61026	RAB10	GK[+281.2]GEQIAR	0.950119	0.8593	0.904709
	RAB10 Average		0.737721	1.03588	0.886798
P62491	RAB11A	IVSQK[+281.2]QM[+16]SDR
P62491	RAB11A	IVSQK[+281.2]QMSDR
	RAB11A Average
Q15907	RAB11B	VVLIGDSGVGK[+281.2]SNLLSR	1.33547	0.6966	1.01604
Q15907	RAB11B	TIK[+281.2]AQIWDTAGQER	2.12766	1.22	1.67383
Q15907	RAB11B	IVSQK[+281.2]QIADR
	RAB11B Average		1.73156	0.9583	1.34493
Q6IQ22	RAB12	GVGK[+281.2]TSLM[+16]ER	0.255754	0.2	0.227877
Q6IQ22	RAB12	GVGK[+281.2]TSLMER	0.202429	0.21	0.206215
	RAB12 Average		0.229092	0.205	0.217046
P51153	RAB13	LLLIGDSGVGK[+281.2]TC[+57]LIIR
P51153	RAB13	IK[+281.2]LQVWDTAGQER	1.29116	0.8493	1.07023
P51153	RAB13	VQK[+281.2]EQADK
P51153	RAB13	DILLK[+281.2]SGGR
	RAB13 Average		1.29116	0.8493	1.07023
P61106	RAB14	YIIIGDM[+16]GVGK[+281.2]SC[+57]LLHQFTEK
P61106	RAB14	SC[+57]LLHQFTEK[+281.2]K
P61106	RAB14	K[+281.2]FM[+16]ADC[+57]PHTIGVEFGTR
P61106	RAB14	IIEVSGQK[+281.2]IK	0.704225	0.87	0.787113
P61106	RAB14	IYQNIQDGSLDLNAAESGVQHK[+281.2]PSAPQGGR
	RAB14 Average		0.704225	0.87	0.787113
P59190	RAB15	LLLIGDSGVGK[+281.2]TC[+57]LLC[+57]R
	RAB15 Average
Q9H0T7	RAB17	LVLLGSGSVGK[+281.2]SSLALR
Q9H0T7	RAB17	LVLLGSGSVGK[+281.2]SSLALR
	RAB17 Average
Q9NP72	RAB18	ILIIGESGVGK[+281.2]SSLLLR
Q9NP72	RAB18	TISVDGNK[+281.2]AK
Q9NP72	RAB18	AK[+281.2]LAIWDTAGQER
Q9NP72	RAB18	EVDRNEGLK[+281.2]FAR	0.806452	0.56	0.683226
Q9NP72	RAB18	K[+281.2]HSM[+16]LFIEASAK
	RAB18 Average		0.806452	0.56	0.683226
P62820	RAB1A	C[+57]DLTTK[+281.2]K	0.925926	0.53	0.727963
P62820	RAB1A	M[+16]GPGATAGGAEK[+281.2]SNVK
P62820	RAB1A	MGPGATAGGAEK[+281.2]SNVK
P62820	RAB1A	SNVK[+281.2]IQSTPVK	0.694444	1.19	0.942222
	RAB1A Average		0.810185	0.86	0.835093
Q9H0U4	RAB1B	LLLIGDSGVGK[+281.2]SC[+57]LLLR
Q9H0U4	RAB1B	LLLIGDSGVGK[+281.2]SC[+57]LLLR
Q9H0U4	RAB1B	LLVGNK[+281.2]SDLTTK
Q9H0U4	RAB1B	SDLTTK[+281.2]K	0.961538	0.91	0.935769
Q9H0U4	RAB1B	K[+281.2]VVDNTTAK
	RAB1B Average		0.961538	0.91	0.935769
Q9NX57	RAB20	M[+58]RK[+281.2]PDSK
	RAB20 Average
Q9UL25	RAB21	VVLLGEGC[+57]VGK[+281.2]TSLVLR	0.807754	0.9461	0.876927
Q9UL25	RAB21	YC[+57]ENK[+281.2]FNDK
Q9UL25	RAB21	FNDK[+281.2]HITTLQASFLTK
Q9UL25	RAB21	K[+281.2]LNIGGK
	RAB21 Average		0.807754	0.9461	0.876927
Q9UL26	RAB22A	TVQYQNELHK[+281.2]FLIWDTAGQER
	RAB22A Average
Q9ULC3	RAB23	IDLLDDSC[+57]IKNEEAEALAK[+281.2]R
Q9ULC3	RAB23	YLAEK[+281.2]YLQK
	RAB23 Average
Q9ULW5	RAB26	L[+42]VGDSGVGK[+281.2]	1.51515	0.67	1.09258
	RAB26 Average		1.51515	0.67	1.09258
P51159	RAB27A	FLALGDSGVGK[+281.2]TSVLYQYTDGK	2.27531	1.7957	2.03551
	RAB27A Average		2.27531	1.7957	2.03551
O00194	RAB27B	LLALGDSGVGK[+281.2]TTFLYR
O00194	RAB27B	LLALGDSGVGK[+281.2]TTFLYR
	RAB27B Average
P51157	RAB28	IVVLGDGASGK[+281.2]TSLTTC[+57]FAQETFGK	1.47059	1.31	1.39029
	RAB28 Average		1.47059	1.31	1.39029
O14966	RAB29	VLVVGDAAVGK[+281.2]TSLVQR	1.44928		1.44928
O14966	RAB29	VLVVGDAAVGK[+281.2]TSLVQR	2.32558	1.86	2.09279
O14966	RAB29	YSQDSFSK[+281.2]HYK
	RAB29 Average		1.88743	1.86	1.77103
P61019	RAB2A	MITIDGK[+281.2]QIK
P61019	RAB2A	EHGLIFM[+16]ETSAK[+281.2]TASNVEEAFINTAK
P61019	RAB2A	TASNVEEAFINTAK[+281.2]EIYEK	1.76398	0.7945	1.27924
	RAB2A Average		1.76398	0.7945	1.27924
Q8WUD1	RAB2B	SC[+57]LLLQFTDK[+281.2]R	1.20482	1.34	1.27241
Q8WUD1	RAB2B	SC[+57]LLLQFTDK[+281.2]R	0.854701	1.03	0.94235
Q8WUD1	RAB2B	QIK[+281.2]LQIWDTAGQESFR
Q8WUD1	RAB2B	TAC[+57]NVEEAFINTAK[+281.2]EIYR
	RAB2B Average		1.02976	1.185	1.10738
Q15771	RAB30	IVLIGNAGVGK[+281.2]TC[+57]LVR
	RAB30 Average
Q13636	RAB31	VC[+57]LLGDTGVGK[+281.2]SSIVC[+57]R
Q13636	RAB31	EVPLK[+281.2]DAK
	RAB31 Average
Q14088	RAB33A	IIVIGDSNVGK[+281.2]TC[+57]LTFR
Q14088	RAB33A	AQK[+281.2]SLLYR
	RAB33A Average
Q9H082	RAB33B	IIVIGDSNVGK[+281.2]TC[+57]LTYR
	RAB33B Average
Q9BZG1	RAB34	FK[+281.2]C[+57]IASTYYR
	RAB34 Average
Q15286	RAB35	LLIIGDSGVGK[+281.2]SSLLLR
Q15286	RAB35	GTHGVIVVYDVTSAESFVNVK[+281.2]R
Q15286	RAB35	QQQQQQNDVVK[+281.2]LTK
	RAB35 Average
Q96DA2	RAB39B	LIVIGDSTVGK[+281.2]SC[+57]LIR
Q96DA2	RAB39B	HEAEK[+281.2]LAAAYGM[+16]K
	RAB39B Average
P20338	RAB4A	FK[+281.2]DDSNHTIGVEFGSK	1.657	0.6063	1.13165
	RAB4A Average		1.657	0.6063	1.13165
P61018	RAB4B	FK[+281.2]QDSNHTIGVEFGSR
	RAB4B Average
P20339	RAB5A	LVLLGESAVGK[+281.2]SSLVLR	0.645161	0.9	0.772581
P20339	RAB5A	LVLLGESAVGK[+281.2]SSLVLR
P20339	RAB5A	NWVK[+281.2]ELQR
P20339	RAB5A	NWVK[+281.2]ELQR
	RAB5A Average		0.645161	0.9	0.772581
P51148	RAB5C	ADLASK[+281.2]R	0.84538	1.1467	0.99604
P51148	RAB5C	TAM[+16]NVNEIFM[+16]AIAK[+281.2]K
	RAB5C Average		0.84538	1.1467	0.99604
Q9NRW1	RAB6B	LVFLGEQSVGK[+281.2]TSLITR	1.43802	0.5331	0.985561
Q9NRW1	RAB6B	TGYNVK[+281.2]QLFR
	RAB6B Average		1.43802	0.5331	0.985561
Q9H0N0	RAB6C	AGYNVK[+281.2]QLFR	1.16401	1.0465	1.10525
	RAB6C Average		1.16401	1.0465	1.10525
P51149	RAB7A	VIILGDSGVGK[+281.2]TSLM[+16]NQYVNK	0.735294	0.6885	0.711897
P51149	RAB7A	VIILGDSGVGK[+281.2]TSLMNQYVNK	0.735294	0.26	0.497647
P51149	RAB7A	FSNQYK[+281.2]ATIGADFLTK	0.75861	0.7242	0.741405
P51149	RAB7A	NALK[+281.2]QETEVELYNEFPEPIK	0.682594	0.6374	0.659997
	RAB7A Average		0.727948	0.577525	0.652737
P61006	RAB8A	TIELDGK[+281.2]R
P61006	RAB8A	KLEGNSPQGSNQGVK[+281.2]ITPDQQK
P61006	RAB8A	LEGNSPQGSNQGVK[+281.2]ITPDQQK
P61006	RAB8A	ITPDQQK[+281.2]R	1.4339	0.52	0.976949
	RAB8A Average		1.4339	0.52	0.976949
Q92930	RAB8B	LLLIGDSGVGK[+281.2]TC[+57]LLFR
Q92930	RAB8B	LLLIGDSGVGK[+281.2]TC[+57]LLFR
Q92930	RAB8B	KM[+16]NDSNSAGAGGPVK[+281.2]ITENR
	RAB8B Average
Q9UBK7	RABL2A	IIC[+57]LGDSAVGK[+281.2]SK	2.32558	0.6	1.46279
Q9UBK7	RABL2A	IIC[+57]LGDSAVGK[+281.2]SK
Q9UBK7	RABL2A	K[+281.2]FSLPLYFVSAADGTNVVK
	RABL2A Average		2.32558	0.6	1.46279
Q5HYI8	RABL3	VLVLGDSGVGK[+281.2]
Q5HYI8	RABL3	FGAGTLK[+281.2]SLHYD
	RABL3 Average
Q3YEC7	RABL6	K[+281.2]LVGSDQAPGR	1.0989	1.05	1.07445
Q3YEC7	RABL6	DK[+281.2]NIPAGLQSM[+16]NQALQR
Q3YEC7	RABL6	NSFGLK[+281.2]YLHK
	RABL6 Average		1.0989	1.05	1.07445
P63000	RAC1	K[+281.2]LTPITYPQGLAM[+16]AK
P63000	RAC1	LTPITYPQGLAMAK[+281.2]EIGAVK
P63000	RAC1	EIGAVK[+281.2]YLEC[+57]SALTQR
	RAC1 Average
P15153	RAC2	AK[+281.2]WFPEVR
P15153	RAC2	K[+281.2]LAPITYPQGLALAK
P15153	RAC2	EIDSVK[+281.2]YLEC[+57]SALTQR
	RAC2 Average
P11234	RALB	SK[+281.2]GQSSLALHK
P11234	RALB	SK[+281.2]GQSSLALHK
	RALB Average
P62826	RAN	LVLVGDGGTGK[+281.2]TTFVK	2.14823	1.1595	1.65386
P62826	RAN	FNVWDTAGQEK[+281.2]FGGLR	1.66306	2.1339	1.89848
P62826	RAN	AK[+281.2]SIVFHR	1.51263	1.2265	1.36957
P62826	RAN	K[+281.2]NLQYYDISAK	1.45222	0.9881	1.22016
	RAN Average		1.69404	1.377	1.53552
P61224	RAP1B	VVGK[+281.2]EQGQNLAR
P61224	RAP1B	K[+281.2]TPVPGK
P61224	RAP1B	TPVPGK[+281.2]AR	1.09818	1.3149	1.20654
	RAP1B Average		1.09818	1.3149	1.20654
Q96D21	RASD2	EAAELPMVIC[+57]GNK[+281.2]
	RASD2 Average
O75628	REM1	VVLLGDPGVGK[+281.2]TSLASLFAGK
O75628	REM1	VVLLGDPGVGK[+281.2]TSLASLFAGK
	REM1 Average
Q96A58	RERG	AGVGK[+281.2]SALVVR
Q96A58	RERG	NILDEIK[+281.2]K	1.05042	1.5677	1.30906
	RERG Average		1.05042	1.5677	1.30906
Q15382	RHEB	K[+281.2]IAILGYR
Q15382	RHEB	SFEVIK[+281.2]VIHGK
Q15382	RHEB	VQIPIM[+16]LVGNKK[+281.2]
Q15382	RHEB	K[+281.2]DLHMER
	RHEB Average
P61586	RHOA	K[+281.2]LVIVGDGAC[+57]GK	0.868734	0.6588	0.763767
P61586	RHOA	M[+16]K[+281.2]QEPVKPEEGR	2.40848	1.4703	1.93939
P61586	RHOA	MK[+281.2]QEPVKPEEGR	1.65618	1.4736	1.56489
P61586	RHOA	IGAFGYM[+16]EC[+57]SAK[+281.2]TK	0.806452	0.89	0.848226
P61586	RHOA	IGAFGYM[+16]EC[+57]SAK[+281.2]TK	0.8	0.82	0.81
P61586	RHOA	IGAFGYMEC[+57]SAK[+281.2]TK
	RHOA Average		1.30797	1.06254	1.18525
P08134	RHOC	M[+16]K[+281.2]QEPVR
P08134	RHOC	M[+16]K[+281.2]QEPVRSEEGR
P08134	RHOC	ISAFGYLEC[+57]SAK[+281.2]TK	0.884956	0.79	0.837478
P08134	RHOC	ISAFGYLEC[+57]SAK[+281.2]TK
	RHOC Average		0.884956	0.79	0.837478
O00212	RHOD	K[+281.2]VPIIVVGC[+57]K
	RHOD Average
Q9HBH0	RHOF	VALSALK[+281.2]K	0.847458	0.93	0.888729
	RHOF Average		0.847458	0.93	0.888729
P84095	RHOG	LK[+281.2]EQGQAPITPQQGQALAK
P84095	RHOG	EQGQAPITPQQGQALAK[+281.2]QIHAVR
P84095	RHOG	AVLNPTPIK[+281.2]R	1.9972	1.4927	1.74495
	RHOG Average		1.9972	1.4927	1.74495
Q8IXI2	RHOT1	HSIDK[+281.2]VTSR
Q8IXI2	RHOT1	K[+281.2]HISDGVADSGLTLK
Q8IXI2	RHOT1	NC[+57]GK[+281.2]SGVLQALLGR	0.930839	0.7925	0.861669
Q8IXI2	RHOT1	IREDHK[+281.2]SYYAINTVYVYGQEK	0.460829	0.43	0.445415
Q8IXI2	RHOT1	EDHK[+281.2]SYYAINTVYVYGQEK	0.934579	0.24	0.58729
	RHOT1 Average		0.775416	0.4875	0.631458
Q8IXI1	RHOT2	VPIILVGNK[+281.2]SDLR
Q8IXI1	RHOT2	GVGK[+281.2]SAFLQAFLGR
	RHOT2 Average
P61587	RND3	ASQK[+281.2]LSSK
	RND3 Average
O60942	RNGTT	LQC[+57]K[+281.2]GHGEC[+57]PTTENTETFIR
O60942	RNGTT	M[+16]K[+281.2]TGLIDK
O60942	RNGTT	K[+281.2]LLEGNFAK
O60942	RNGTT	ELK[+281.2]QYDNK
	RNGTT Average
P55042	RRAD	VLLLGAPGVGK[+281.2]SALAR
P55042	RRAD	VLLLGAPGVGK[+281.2]SALAR
	RRAD Average
Q7L523	RRAGA	PNTAM[+16]K[+281.2]K
Q7L523	RRAGA	SGSGK[+281.2]TSM[+16]R
Q7L523	RRAGA	FEK[+281.2]ISNIIK
	RRAGA Average
Q9HB90	RRAGC	SGK[+281.2]SSIQK	0.885112	0.6647	0.774906
Q9HB90	RRAGC	MSPNETLFLESTNK[+281.2]IYK
	RRAGC Average		0.885112	0.6647	0.774906
Q9NQL2	RRAGD	K[+281.2]AIHEVFEVR
	RRAGD Average
P62070	RRAS2	DGSGQEK[+281.2]YR
	RRAS2 Average
Q9BST9	RTKN	GSALEMEFK[+281.2]R
Q9BST9	RTKN	EGAC[+57]K[+281.2]LLAAC[+57]SQR	0.990099	0.97	0.98005
Q9BST9	RTKN	EAQVLGK[+281.2]TSR	1.07527	1.7511	1.41318
Q9BST9	RTKN	LATK[+281.2]LSSSLGR	1.18175	0.7498	0.965777
	RTKN Average		1.08237	1.15697	1.11967
Q9NR31	SAR1A	SGK[+281.2]LVFLGLDNAGK
Q9NR31	SAR1A	LVFLGLDNAGK[+281.2]TTLLHM[+16]LK
Q9NR31	SAR1A	TTLLHM[+16]LK[+281.2]DDR	1.08696	0.99	1.03848
Q9NR31	SAR1A	TTLLHMLK[+281.2]DDR	1.22654	1.1316	1.17907
Q9NR31	SAR1A	TDAISEEK[+281.2]LR	1.72622	1.8804	1.80331
Q9NR31	SAR1A	GNVTLK[+281.2]ELNAR	3.125	1.0444	2.0847
	SAR1A Average		1.79118	1.2616	1.52639
Q9Y6B6	SAR1B	TGK[+281.2]LVFLGLDNAGK
Q9Y6B6	SAR1B	GSISLK[+281.2]ELNAR
Q9Y6B6	SAR1B	PLEVFM[+16]C[+57]SVLK[+281.2]R
	SAR1B Average
P49903	SEPHS1	FTELK[+281.2]GTGC[+57]K
P49903	SEPHS1	DK[+281.2]VM[+16]PLIIQGFK
P49903	SEPHS1	FC[+57]AEIK[+281.2]SPK	1.59719	1.07	1.33359
	SEPHS1 Average		1.59719	1.07	1.33359
Q8WYJ6	SEPT1	RGVEIEEGGVK[+281.2]VK
Q8WYJ6	SEPT1	AVHEK[+281.2]VNIIPVIGK
	SEPT1 Average
Q9P0V9	SEPT10	LK[+281.2]AQTYELQESNVQLK	0.398311	0.1789	0.288606
Q9P0V9	SEPT10	TELQK[+281.2]FK	0.132275	0.1437	0.137988
Q9P0V9	SEPT10	VKEK[+281.2]EAILK
	SEPT10 Average		0.265293	0.1613	0.213297
Q9NVA2	SEPT11	ADTIAK[+281.2]NELHK
Q9NVA2	SEPT11	K[+281.2]AAAQLLQSQAQQSGAQQTK
Q9NVA2	SEPT11	AAAQLLQSQAQQSGAQQTK[+281.2]K
	SEPT11 Average
Q15019	SEPT2	ADTLTLK[+281.2]ER	1.2631	0.8324	1.04775
Q15019	SEPT2	LLK[+281.2]ASIPFSVVGSNQLIEAK	1.28205	0.78	1.03103
Q15019	SEPT2	K[+281.2]VENEDM[+16]NKDQILLEK
Q15019	SEPT2	K[+281.2]VENEDMNKDQILLEK
	SEPT2 Average		1.27258	0.8062	1.03939
Q9UH03	SEPT3	IPK[+281.2]TVEIK
	SEPT3 Average
O43236	SEPT4	K[+281.2]NIQDNR
	SEPT4 Average
Q99719	SEPT5	SK[+281.2]LATPEDK
Q99719	SEPT5	HTVDIEEK[+281.2]GVK
	SEPT5 Average
Q14141	SEPT6	ADAISK[+281.2]SELTK
Q14141	SEPT6	SELTK[+281.2]FK	0.990099	0.97	0.98005
Q14141	SEPT6	SLDDEVNAFK[+281.2]QR
Q14141	SEPT6	TAAELLQSQGSQAGGSQTLK[+281.2]R
	SEPT6 Average		0.990099	0.97	0.98005
Q16181	SEPT7	K[+281.2]TVQVEQSK	0.689417	0.6512	0.670309
Q16181	SEPT7	LK[+281.2]DSEAELQR	0.817528	0.8085	0.813014
Q16181	SEPT7	NLEAQHK[+281.2]ELEEK
	SEPT7 Average		0.753473	0.72985	0.741661
Q92599	SEPT8	ADTISK[+281.2]SELHK
Q92599	SEPT8	VGNK[+281.2]LVR
Q92599	SEPT8	RK[+281.2]EFLSELQR
	SEPT8 Average
Q9UHD8	SEPT9	RVELSGPK[+281.2]AAEPVSR
Q9UHD8	SEPT9	VPEVPTAPATDAAPK[+281.2]R	0.521757	0.5979	0.559829
Q9UHD8	SEPT9	DAGLK[+281.2]QAPASR	0.700771	0.8248	0.762785
Q9UHD8	SEPT9	TIEIK[+281.2]SITHDIEEK
	SEPT9 Average		0.611264	0.71135	0.661307
Q07617	SPAG1	LTGK[+281.2]AEGGK
Q07617	SPAG1	GQTPEAGADK[+281.2]R
Q07617	SPAG1	ALC[+57]YLK[+281.2]LC[+57]QFEEAK
Q07617	SPAG1	LLNLK[+281.2]DK
	SPAG1 Average
P61011	SRP54	LDGHAK[+281.2]GGGALSAVAATK
P61011	SRP54	LK[+281.2]HGQFTLR
P61011	SRP54	VFSK[+281.2]QPGR	1.78571	1.97	1.87786
	SRP54 Average		1.78571	1.97	1.87786
P08240	SRPRA	EAEESSK[+281.2]IR
P08240	SRPRA	K[+281.2]FEDSEK
P08240	SRPRA	K[+281.2]EGSDGPLATSKPVPAEK
	SRPRA Average
Q9Y5M8	SRPRB	AVLLVGLC[+57]DSGK[+281.2]	1.02041	0.76	0.890204
Q9Y5M8	SRPRB	SAK[+281.2]LIQQQLEK
Q9Y5M8	SRPRB	SAAPSTLDSSSTAPAQLGKK[+281.2]	1.02934	0.8565	0.942918
Q9Y5M8	SRPRB	VEFLEC[+57]SAK[+281.2]GGR	0.949127	1.4042	1.17666
	SRPRB Average		0.999624	1.0069	1.00326
Q96I99	SUCLG2	GK[+281.2]GVFNSGLK	0.965158	1.1769	1.07103
Q96I99	SUCLG2	QM[+16]IGYNLATK[+281.2]QTPK
Q96I99	SUCLG2	QTPK[+281.2]EGVK
	SUCLG2 Average		0.965158	1.1769	1.07103
P21980	TGM2	QEYVLTQQGFIYQGSAK[+281.2]FIK	0.0155767	0.081	0.0482884
P21980	TGM2	FLK[+281.2]NAGR	0.0109613	0.01	0.0104807
P21980	TGM2	ANHLNK[+281.2]LAEK	0.018471	0.0121	0.0152855
	TGM2 Average		0.015003	0.0343667	0.0246848
Q9NWX6	THG1L	SK[+281.2]FEYVR	1.00331	0.9319	0.967605
Q9NWX6	THG1L	HNFAK[+281.2]PNDSR
Q9NWX6	THG1L	VDEVMTK[+281.2]EIK
	THG1L Average		1.00331	0.9319	0.967605
Q9ULW0	TPX2	K[+281.2]ANLQQAIVTPLKPVDNTYYK
Q9ULW0	TPX2	K[+281.2]SVSQVTK
Q9ULW0	TPX2	SK[+281.2]KDDINLLPSK
Q9ULW0	TPX2	DPQTPVLQTK[+281.2]HR
Q9ULW0	TPX2	SPAFALK[+281.2]NR
	TPX2 Average
Q2NL82	TSR1	RDPGNTEPVK[+281.2]AK	0.950661	0.9493	0.94998
Q2NL82	TSR1	AK[+281.2]EELIFHC[+57]GFR
Q2NL82	TSR1	SQDTVLM[+16]NLYK[+281.2]R	1.47907	1.7901	1.63459
Q2NL82	TSR1	SQDTVLMNLYK[+281.2]R	1.13701	1.5118	1.3244
	TSR1 Average		1.18891	1.41707	1.30299
Q71U36	TUBA1A	TIGGGDDSFNTFFSETGAGK[+281.2]HVPR	0.92584	0.8795	0.90267
Q71U36	TUBA1A	GHYTIGK[+281.2]EIIDLVLDR
Q71U36	TUBA1A	DVNAAIATIK[+281.2]TK	1.19689	1.5633	1.38009
	TUBA1A Average		1.06136	1.2214	1.14138
Q9BQE3	TUBA1C	AYHEQLTVAEITNAC[+57]FEPANQMVK[+281.2]C[+57]DPR
Q9BQE3	TUBA1C	AYHEQLTVAEITNAC[+57]FEPANQM[+16]VK[+281.2]C[+57]DPR	0.808146	0.8286	0.818373
	TUBA1C Average		0.808146	0.8286	0.818373
Q6PEY2	TUBA3E	GHYTIGK[+281.2]EIVDLVLDR
	TUBA3E Average
P68366	TUBA4A	GHYTIGK[+281.2]EIIDPVLDR	1.45328	1.2795	1.36639
P68366	TUBA4A	GDVVPK[+281.2]DVNAAIAAIK	1.25078	1.8485	1.54964
P68366	TUBA4A	DVNAAIAAIK[+281.2]TK	0.791139	1.0134	0.90227
	TUBA4A Average		1.16507	1.38047	1.27277
P07437	TUBB	ISVYYNEATGGK[+281.2]YVPR	1.38562	0.863	1.12431
P07437	TUBB	ALTVPELTQQVFDAK[+281.2]NMM[+16]AAC[+57]DPR
P07437	TUBB	ALTVPELTQQVFDAK[+281.2]NM[+16]M[+16]AAC[+57]DPR
P07437	TUBB	M[+16]AVTFIGNSTAIQELFK[+281.2]R
	TUBB Average		1.38562	0.863	1.12431
Q13885	TUBB2A	INVYYNEAAGNK[+281.2]YVPR	0.292398	0.18	0.236199
Q13885	TUBB2A	ALTVPELTQQMFDSK[+281.2]
Q13885	TUBB2A	ALTVPELTQQMFDSK[+281.2]NMMAAC[+57]DPR
	TUBB2A Average		0.292398	0.18	0.236199
Q9BVA1	TUBB2B	INVYYNEATGNK[+281.2]YVPR	0.110742	0.0543	0.082521
	TUBB2B Average		0.110742	0.0543	0.082521
Q13509	TUBB3	ISVYYNEASSHK[+281.2]YVPR
Q13509	TUBB3	GLK[+281.2]M[+16]SSTFIGNSTAIQELFK
Q13509	TUBB3	M[+16]SSTFIGNSTAIQELFK[+281.2]R
	TUBB3 Average
P68371	TUBB4B	INVYYNEATGGK[+281.2]YVPR	0.699888	0.5293	0.614594
	TUBB4B Average		0.699888	0.5293	0.614594
Q9BUF5	TUBB6	INVYYNESSSQK[+281.2]YVPR
Q9BUF5	TUBB6	K[+281.2]EC[+57]EHC[+57]DC[+57]LQGFQLTHSLGGGTGSGM[+16]GTLLISK
Q9BUF5	TUBB6	GPMSMK[+281.2]EVDEQMLAIQSK
Q9BUF5	TUBB6	GLK[+281.2]M[+16]ASTFIGNSTAIQELFK
	TUBB6 Average
Q9UJT0	TUBE1	SLVTSSSGALK[+281.2]K	3.125	2.9	3.0125
	TUBE1 Average		3.125	2.9	3.0125
P23258	TUBG1	K[+281.2]TTVLDVMR	1.25	1.05	1.15
P23258	TUBG1	K[+281.2]TTVLDVM[+16]R
P23258	TUBG1	LLQPK[+281.2]NVM[+16]VSTGR
	TUBG1 Average		1.25	1.05	1.15
P49411	TUFM	ILAEGGGAK[+281.2]FK	1.37988	1.7532	1.56654
P49411	TUFM	DPELGLK[+281.2]SVQK	1.44363	1.4866	1.46511
P49411	TUFM	K[+281.2]GDEC[+57]ELLGHSK	1.26646	0.8462	1.05633
	TUFM Average		1.36332	1.362	1.36266
Q96BW1	UPRT	FEK[+281.2]GNC[+57]GVSIM[+16]R
	UPRT Average
Q8TCY9	URGCP	FLNK[+281.2]LIPVLK
Q8TCY9	URGCP	FATGK[+281.2]SC[+57]GPR
	URGCP Average

## Sheet: quantified peptides
Uniprot	Protein Gene	Peptide Modified Sequence	ratio(SW620/480)	%RSD (different peptides)	Category	ratio-F (H/L)	ratio-R (L/H)	log2-F	log2-R	log2-Avg.	iRT	RT avg.		p-loop
P30520	ADSS	Average	1.09308	0.208509	other GTP-binding proteins	1.23298	0.953167	0.292015	-0.137136	0.128393				not unique
		AFK[+281.2]ELPVNAQNYVR	1.29438			1.24116	1.3476	0.311685	0.430392	0.372259	58.42	92.3
		GK[+281.2]GLEGWEK	0.845612			1.05152	0.6397	0.0724828	-0.644533	-0.241932	40.44	78.95
		K[+281.2]GIGPVYSSK	1.13924			1.40627	0.8722	0.491876	-0.197269	0.188067	28.09	69.27
Q8N142	ADSSL1	Average	0.616535	#N/A	other GTP-binding proteins	0.616371	0.6167	-0.69813	-0.697359	-0.697744
		WVGVGK[+281.2]SR	0.616535			0.616371	0.6167	-0.69813	-0.697359	-0.697744	31.11	71.41
Q96P47	AGAP3	Average	3.60289	#N/A	small GTPases, others	3.97298	3.2328	1.99022	1.69278	1.84916
		QGILLK[+281.2]R	3.60289			3.97298	3.2328	1.99022	1.69278	1.84916	40.44	79.03
Q9UIJ7	AK3	Average	0.58945	0.183996	other GTP-binding proteins	0.651549	0.52735	-0.640494	-0.927195	-0.76256
		AVIM[+16]GAPGSGK[+281.2]GTVSSR	0.512759			0.537519	0.488	-0.895613	-1.03505	-0.963646	17.93	61.85
		AVIMGAPGSGK[+281.2]GTVSSR	0.66614			0.76558	0.5667	-0.385376	-0.819343	-0.586103	29.74	70.66
P27144	AK4	Average	0.534713	0.180606	other GTP-binding proteins	0.437476	0.63195	-1.22281	-0.666318	-0.903163
		AVILGPPGSGK[+281.2]GTVC[+57]QR	0.466426			0.349052	0.5838	-1.51848	-0.776454	-1.10028	38.66	77.9
		DVAK[+281.2]PVIELYK	0.603			0.525901	0.6801	-0.927138	-0.556181	-0.729769	64.52	97.16
P08133	ANXA6	Average	0.18314	0.276861	other GTP-binding proteins	0.16293	0.20335	-2.63971	-2.33167	-2.44898
		GTVRPANDFNPDADAK[+281.2]ALR	0.147286			0.134673	0.1599	-2.89247	-2.64476	-2.7633	34.95	74.88
		YELTGK[+281.2]FER	0.218993			0.191186	0.2468	-2.38695	-2.01859	-2.19104	47.85	84.34
Q9NRY4	ARHGAP35	Average	0.901649	#N/A	other GTP-binding proteins	0.761499	1.0418	-0.393087	0.0590783	-0.149362
		AAATK[+281.2]LASAEK	0.901649			0.761499	1.0418	-0.393087	0.0590783	-0.149362	15.74	60.13
Q13017	ARHGAP5	Average	1.1167	0.56821	other GTP-binding proteins	0.943944	1.28945	-0.384426	0.312901	0.159238
		SK[+281.2]KPVIIAATK	0.668025			0.392449	0.9436	-1.34942	-0.0837527	-0.582027	16.32	60.88
		TIEAGIGK[+281.2]NPR	1.56537			1.49544	1.6353	0.580569	0.709555	0.646503	22.64	65.92
P36404	ARL2	Average	2.95806	#N/A	small GTPases, Sar1/Arf family	3.99042	1.9257	1.99654	0.945383	1.56465
		LNIWDVGGQK[+281.2]SLR	2.95806			3.99042	1.9257	1.99654	0.945383	1.56465	73.1	103.19
P60953	CDC42	Average	1.34624	0.355541	small GTPases, Rho family	1.34461	1.34787	0.326367	0.374981	0.428935
		AVK[+281.2]YVEC[+57]SALTQK	0.798049			0.716897	0.8792	-0.480162	-0.185737	-0.325451	35.5	75.32
		NK[+281.2]QKPITPETAEK	1.55939			1.68748	1.4313	0.754869	0.517326	0.640981	-0.87	48
		QK[+281.2]PITPETAEK	1.68128			1.62946	1.7331	0.704395	0.793355	0.74956	14.91	59.86
Q05193	DNM1	Average	1.62502	0.186524	Dynamin and dynamin like	1.29955	1.9505	0.378007	0.927991	0.70046
		K[+281.2]YM[+16]LSVDNLK	1.83935			1.2987	2.38	0.37707	1.25096	0.879197	50.73	86.28
		K[+281.2]YMLSVDNLK	1.4107			1.30039	1.521	0.378944	0.60502	0.496406	58.78	91.92
O00429	DNM1L	Average	1.46556	#N/A	Dynamin and dynamin like	1.11111	1.82	0.152003	0.863938	0.551448
		SQLDINNK[+281.2]K	1.46556			1.11111	1.82	0.152003	0.863938	0.551448	18.21	62.06
P50570	DNM2	Average	1.69097	#N/A	Dynamin and dynamin like	1.88324	1.4987	0.913216	0.583712	0.757851
		NVYK[+281.2]DLR	1.69097			1.88324	1.4987	0.913216	0.583712	0.757851	28.77	69.66
Q9Y295	DRG1	Average	1.18127	#N/A	other GTP-binding proteins	1.49254	0.87	0.577767	-0.200913	0.240337
		K[+281.2]IIENELEGFGIR	1.18127			1.49254	0.87	0.577767	-0.200913	0.240337	79.55	108.19
P55039	DRG2	Average	1.25423	#N/A	other GTP-binding proteins	1.40845	1.1	0.494109	0.137504	0.326797
		AQLLEPSK[+281.2]SASSK	1.25423			1.40845	1.1	0.494109	0.137504	0.326797	25.34	67.21
Q5VTE0	EEF1A1P5	Average	1.5465	0.233838	elongation/initiation factors	1.4327	1.6603	0.490126	0.702138	0.629008
		AAGAGK[+281.2]VTK	1.20515			1.1798	1.2305	0.238545	0.299245	0.269214	-5.12	44.42
		VETGVLK[+281.2]PGM[+16]VVTFAPVNVTTEVK	1.92547			1.84604	2.0049	0.884434	1.00353	0.945211	78.18	107.45
		VETGVLK[+281.2]PGMVVTFAPVNVTTEVK	1.50888			1.27226	1.7455	0.347399	0.80364	0.59348	91.08	116.14
Q05639	EEF1A2	Average	1.01983	0.208461	elongation/initiation factors	1.18117	0.8585	0.235644	-0.26323	0.0283334
		EVSAYIK[+281.2]K	1.17016			1.27502	1.0653	0.350522	0.0912598	0.226707	23.97	65.33
		QTVAVGVIK[+281.2]NVEK	0.869506			1.08731	0.6517	0.120765	-0.61772	-0.201733	46.2	82.74
P13639	EEF2	Average	1.01037	0.159374	elongation/initiation factors	0.963483	1.05725	-0.0714818	0.0764551	0.0148787
		FSK[+281.2]SATSPEGK	1.12423			1.11396	1.1345	0.155695	0.182057	0.168936	12.72	56.78
		LIEK[+281.2]LDIK	0.896504			0.813008	0.98	-0.298658	-0.0291463	-0.157618	52.93	88.27
P57772	EEFSEC	Average	1.13265	0.102415	elongation/initiation factors	1.08215	1.18315	0.113889	0.229327	0.179702
		GPLQTK[+281.2]AK	1.05063			1.07805	1.0232	0.108425	0.0330882	0.0712484	9.32	55.89
		HK[+281.2]HGLVER	1.21467			1.08625	1.3431	0.119354	0.425567	0.280569	-5.94	44.48
Q15029	EFTUD2	Average	1.15046	#N/A	elongation/initiation factors	1.03093	1.27	0.0439433	0.344828	0.202216
		K[+281.2]APTSSSQR	1.15046			1.03093	1.27	0.0439433	0.344828	0.202216	-15.83	36.11
Q9H4M9	EHD1	Average	1.1067	#N/A	Dynamin and dynamin like	0.943396	1.27	-0.0840643	0.344828	0.146262
		K[+281.2]KEPELFQTVAEGLR	1.1067			0.943396	1.27	-0.0840643	0.344828	0.146262	70.85	98.97
Q9H223	EHD4	Average	1.12744	0.3938	Dynamin and dynamin like	1.21988	1.035	0.260774	-0.0661128	0.173053
		ISGVNAK[+281.2]K	1.44139			1.44928	1.4335	0.535332	0.519542	0.527458	3.28	50.58
		VVLNK[+281.2]ADQVDTQQLMR	0.813496			0.990491	0.6365	-0.0137838	-0.651768	-0.297793	50.32	86.2
P41091	EIF2S3	Average	1.12907	0.0886323	elongation/initiation factors	1.06795	1.1902	0.0832696	0.244947	0.175141
		GNFK[+281.2]LVR	1.01365			0.920895	1.1064	-0.118891	0.145873	0.0195561	39.39	78.04
		IDLVK[+281.2]ESQAK	1.1821			1.25	1.1142	0.321928	0.156008	0.241352	32.21	72.05
		SC[+57]GSSTPDEFPTDIPGTK[+281.2]GNFK	1.19148			1.03295	1.35	0.046772	0.432959	0.252749	56.97	91.29
P55010	EIF5	Average	0.777374	0.10225	elongation/initiation factors	0.780897	0.77385	-0.362055	-0.372411	-0.36332
		K[+281.2]QTIGNSC[+57]K	0.833579			0.847458	0.8197	-0.238787	-0.286832	-0.262609	-0.43	48.11
		YVSK[+281.2]ELAK	0.721168			0.714337	0.728	-0.485324	-0.45799	-0.471592	20.4	63.01
O60841	EIF5B	Average	0.961095	0.138156	elongation/initiation factors	1.00686	0.915333	0.0021779	-0.146099	-0.0572492
		APIIC[+57]VLGHVDTGKTK[+281.2]	0.894217			0.878735	0.9097	-0.186501	-0.136537	-0.161303	54.66	89.93
		EQEPQK[+281.2]SK	1.11402			1.13173	1.0963	0.178535	0.132643	0.155771	-11.14	39.55
		KSPDSDVAATLK[+281.2]K	0.875051			1.0101	0.74	0.0144996	-0.434403	-0.192562	20.82	63.67
O75616	ERAL1	Average	1.29333	#N/A	other GTP-binding proteins	0.666667	1.92	-0.584963	0.941106	0.371094
		VVLLGAPNAGK[+281.2]STLSNQLLGR	1.29333			0.666667	1.92	-0.584963	0.941106	0.371094	77.29	106.43
Q02790	FKBP4	Average	1.0828	0.102616	other GTP-binding proteins	1.21343	0.952167	0.194032	-0.116107	0.114764
		GEHSIVYLK[+281.2]PSYAFGSVGK	0.981554			0.749008	1.2141	-0.416948	0.279887	-0.0268608	65.14	96.91
		GTVYFK[+281.2]EGK	1.06517			1.14364	0.9867	0.193635	-0.0193166	0.0910846	31.66	71.65
		VLQLYPNNKAAK[+281.2]	1.20167			1.74764	0.6557	0.805409	-0.608892	0.265041	40.71	79
O14772	FPGT	Average	2.53068	0.533201	other GTP-binding proteins	3.47536	1.586	1.63665	0.628101	1.33953
		YATM[+16]AFGVQDNLK[+281.2]K	3.48483			5.02765	1.942	2.32988	0.957543	1.80109	44.14	81.08
		YATMAFGVQDNLK[+281.2]K	1.57654			1.92308	1.23	0.943416	0.298658	0.65676	57.46	90.84
Q96RP9	GFM1	Average	0.703258	0.0966596	elongation/initiation factors	0.713491	0.693025	-0.528896	-0.540578	-0.507874
		FSK[+281.2]GIGR	0.785764			0.964227	0.6073	-0.052555	-0.719519	-0.347833	23.7	64.95
		K[+281.2]QSGGAGQYGK	0.732159			0.723118	0.7412	-0.467697	-0.432065	-0.449771	-8.39	42.05
		NIGISAHIDSGK[+281.2]TTLTER	0.644882			0.679763	0.61	-0.556895	-0.713119	-0.632894	38.75	77.98
		SFTPVFLGSALK[+281.2]NK	0.650227			0.486855	0.8136	-1.03844	-0.297608	-0.620984	80.65	108.43
P00367	GLUD1	Average	2.61259	0.267873	other GTP-binding proteins	2.37013	2.85505	1.1611	1.46787	1.38548
		FGK[+281.2]HGGTIPIVPTAEFQDR	2.42287			2.74273	2.103	1.45561	1.07245	1.27671	57.73	91.65
		INPK[+281.2]NYTDNELEK	1.70243			1.19246	2.2124	0.253945	1.14561	0.767597	35.09	73.76
		ISGASEK[+281.2]DIVHSGLAYTM[+16]ER	3.15647			2.57003	3.7429	1.36179	1.90416	1.65831	48.59	85.31
		ISGASEK[+281.2]DIVHSGLAYTMER	3.1686			2.9753	3.3619	1.57304	1.74928	1.66385	59.38	92.93
Q96IJ6	GMPPA	Average	1.1342	#N/A	other GTP-binding proteins	1.4979	0.7705	0.582944	-0.376133	0.181677
		AVILIGGPQK[+281.2]GTR	1.1342			1.4979	0.7705	0.582944	-0.376133	0.181677	47.35	83.94
Q9Y5P6	GMPPB	Average	0.674008	0.0354402	other GTP-binding proteins	0.610366	0.73765	-0.716834	-0.448038	-0.569162
		IQLQPTSIEK[+281.2]EVFPIMAK	0.690899			0.561798	0.82	-0.831877	-0.286304	-0.533454	97.66	120.57
		VEEPSK[+281.2]YGVVVC[+57]EADTGR	0.657118			0.658935	0.6553	-0.601792	-0.609773	-0.605777	48.95	84.79
#N/A	GNA11/14/Q	Average	0.817478	#N/A	G-alpha	0.884956	0.75	-0.176323	-0.415037	-0.290748
		LLLLGTGESGK[+281.2]STFIK	0.817478			0.884956	0.75	-0.176323	-0.415037	-0.290748	79.69	107.72
#N/A	GNA12/13	Average	1.92548	#N/A	G-alpha	2.38095	1.47	1.25154	0.555816	0.945215
		ILLLGAGESGK[+281.2]STFLK	1.92548			2.38095	1.47	1.25154	0.555816	0.945215	81.06	108.74
Q14344	GNA13	Average	1.96389	#N/A	G-alpha	2.77778	1.15	1.47393	0.201634	0.973713
		GIHEYDFEIK[+281.2]NVPFK	1.96389			2.77778	1.15	1.47393	0.201634	0.973713	66.59	98.48
P04899	GNAI2	Average	3.44646	0.16057	G-alpha	3.90293	2.99	1.92756	1.57949	1.78512
		DLHFK[+281.2]M[+16]FDVGGQR	3.83777			4.77555	2.9	2.25567	1.53605	1.94027	80.72	109.1
		FEDLNK[+281.2]R	3.05515			3.0303	3.08	1.59946	1.62293	1.61124	23.52	65.77
#N/A	GNAS, GNAL, GNAI1/2/3, GNAT1/2/3, GNAO1	Average	2.83636	#N/A	G-alpha	2.27273	3.4	1.18442	1.76553	1.50404
		LLLLGAGESGK[+281.2]STIVK	2.83636			2.27273	3.4	1.18442	1.76553	1.50404	68.3	99.16
Q9BVP2	GNL3	Average	2.68667	#N/A	other GTP-binding proteins	3.33333	2.04	1.73697	1.02857	1.42582
		EFGLC[+57]K[+281.2]TENK	2.68667			3.33333	2.04	1.73697	1.02857	1.42582	38.61	76.4
P15170	GSPT1	Average	1.43151	0.0792427	elongation/initiation factors	1.26687	1.59615	0.308355	0.671338	0.51754
		K[+281.2]VGFNPK	1.51172			1.53445	1.489	0.61772	0.574344	0.596195	23.15	64.73
		SVVAPPGAPKK[+281.2]	1.3513			0.9993	1.7033	-0.00100953	0.768333	0.434348	14.78	59.07
O00178	GTPBP1	Average	1.23711	#N/A	other GTP-binding proteins	1.36333	1.1109	0.447131	0.151729	0.306978
		VK[+281.2]SQGAC[+57]VTPASGC[+57]	1.23711			1.36333	1.1109	0.447131	0.151729	0.306978	12.99	57.45
A4D1E9	GTPBP10	Average	0.777718	#N/A	other GTP-binding proteins	0.485437	1.07	-1.04264	0.0976108	-0.36268
		LLTNFLPLK[+281.2]GQK	0.777718			0.485437	1.07	-1.04264	0.0976108	-0.36268	80.92	108.79
Q8N442	GUF1	Average	1.22805	#N/A	elongation/initiation factors	1.11819	1.3379	0.161169	0.41997	0.296365
		EK[+281.2]EITIINPAQFPDK	1.22805			1.11819	1.3379	0.161169	0.41997	0.296365	68.65	99.8
Q9Y450	HBS1L	Average	1.84842	0.118955	elongation/initiation factors	1.93685	1.76	0.9392	0.813213	0.886295
		LISVLNK[+281.2]STGEVTK	2.08279			2.32558	1.84	1.21759	0.879706	1.05852	52.16	87.23
		STGEVTK[+281.2]K	1.64668			1.67336	1.62	0.742748	0.695994	0.71956	-5.67	43.38
		YEQESK[+281.2]K	1.8158			1.81159	1.82	0.85726	0.863938	0.860603	-7.32	41.63
P08238	HSP90AB1	Average	1.84125	#N/A	other GTP-binding proteins	1.5625	2.12	0.643856	1.08406	0.880686
		FYEAFSK[+281.2]NLK	1.84125			1.5625	2.12	0.643856	1.08406	0.880686	55.12	89.22
Q9BW83	IFT27	Average	1.34993	#N/A	other GTP-binding proteins	1.36986	1.33	0.454032	0.411426	0.432886
		C[+57]ILAGDPAVGK[+281.2]TALAQIFR	1.34993			1.36986	1.33	0.454032	0.411426	0.432886	105.28	127.11
Q9NS86	LANCL2	Average	1.16984	#N/A	other GTP-binding proteins	0.991277	1.3484	-0.0126402	0.431249	0.226309
		SLDYVK[+281.2]R	1.16984			0.991277	1.3484	-0.0126402	0.431249	0.226309	26.85	67.34
Q9H089	LSG1	Average	0.796698	#N/A	other GTP-binding proteins	0.943396	0.65	-0.0840643	-0.621488	-0.327895
		LNIK[+281.2]FVPAEAR	0.796698			0.943396	0.65	-0.0840643	-0.621488	-0.327895	61.52	95.42
Q8IVH4	MMAA	Average	1.19632	0.215004	other GTP-binding proteins	1.78329	0.60935	0.798368	-0.716484	0.258606
		LSVLAVDPSSC[+57]TSGGSLLGDK[+281.2]TR	1.3782			2.1777	0.5787	1.12281	-0.789112	0.462785	68.98	99.93
		VGLSGPPGAGK[+281.2]STFIEYFGK	1.01444			1.38889	0.64	0.473931	-0.643856	0.0206899	88.95	114.87
P46199	MTIF2	Average	1.37594	#N/A	elongation/initiation factors	0.75188	2	-0.411426	1	0.460417
		SQLSSTK[+281.2]SK	1.37594			0.75188	2	-0.411426	1	0.460417	-2.24	46.2
Q14978	NOLC1	Average	0.961126	#N/A	other GTP-binding proteins	0.662252	1.26	-0.594549	0.333424	-0.0572028
		AAVVVSK[+281.2]SGSLK	0.961126			0.662252	1.26	-0.594549	0.333424	-0.0572028	27.4	67.43
Q9NTK5	OLA1	Average	0.685657	0.21232	other GTP-binding proteins	0.826314	0.545	-0.277979	-0.936514	-0.544441
		FDFLC[+57]QYHK[+281.2]PASK	0.582717			0.775434	0.39	-0.366924	-1.35845	-0.779132	53.7	89.4
		GTK[+281.2]APQAAGK	0.788596			0.877193	0.7	-0.189034	-0.514573	-0.342641	-9.77	40.72
O60313	OPA1	Average	1.00422	0.476909	Dynamin and dynamin like	1.16849	0.83995	0.080466	-0.285517	0.00607346
		IDQLQEELLHTQLK[+281.2]YQR	1.34287			1.66583	1.0199	0.736244	0.0284277	0.425316	66.18	98.6
		VVVVGDQSAGK[+281.2]TSVLEMIAQAR	0.66557			0.671141	0.66	-0.575312	-0.599462	-0.587337	98.28	122.56
Q16822	PCK2	Average	1.25568	0.208497	other GTP-binding proteins	1.44446	1.0669	0.472678	0.0806548	0.328469
		SESTAAAEHK[+281.2]GK	1.49115			1.99601	0.9863	0.997117	-0.0199016	0.576429	-14.73	36.75
		VESK[+281.2]TVIVTPSQR	1.30213			1.33316	1.2711	0.414845	0.346078	0.380871	30.7	70.83
		YVAAAFPSAC[+57]GK[+281.2]	0.973759			1.00422	0.9433	0.00607208	-0.0842114	-0.0383635	42.77	79.99
P61026	RAB10	Average	0.943623	0.163024	small GTPases, Rab family	0.788113	1.09913	-0.362788	0.0708292	-0.0837169
		GK[+281.2]GEQIAR	0.904709			0.950119	0.8593	-0.0738202	-0.218766	-0.144474	3.25	50.46
		K[+281.2]TYDLLFK	0.812984			0.777968	0.848	-0.362217	-0.237864	-0.298701	68.65	99.53
		SFENISK[+281.2]WLR	1.11318			0.636254	1.5901	-0.652326	0.669117	0.154683	83.94	111.18
#N/A	RAB11A/11B	Average	1.34493	#N/A	small GTPases, Rab family	1.73156	0.9583	0.753307	-0.117358	0.427534
		TIK[+281.2]AQIWDTAGQER	1.67383			2.12766	1.22	1.08927	0.286881	0.743153	60.83	94.09
		VVLIGDSGVGK[+281.2]SNLLSR	1.01604			1.33547	0.6966	0.417348	-0.521598	0.0229502	66.18	97.99
Q6IQ22	RAB12	Average	0.217046	0.0705741	small GTPases, Rab family	0.229092	0.205	-2.13584	-2.28673	-2.20393
		GVGK[+281.2]TSLM[+16]ER	0.227877			0.255754	0.2	-1.96717	-2.32193	-2.13367	17.07	61.25
		GVGK[+281.2]TSLMER	0.206215			0.202429	0.21	-2.30451	-2.25154	-2.27778	34.68	73.52
P51153	RAB13	Average	1.07023	#N/A	small GTPases, Rab family	1.29116	0.8493	0.368663	-0.235654	0.0979179
		IK[+281.2]LQVWDTAGQER	1.07023			1.29116	0.8493	0.368663	-0.235654	0.0979179	59.87	93.79
P61106	RAB14	Average	0.787113	#N/A	small GTPases, Rab family	0.704225	0.87	-0.505891	-0.200913	-0.345358
		IIEVSGQK[+281.2]IK	0.787113			0.704225	0.87	-0.505891	-0.200913	-0.345358	32.16	72.42
Q9NP72	RAB18	Average	0.683226	#N/A	small GTPases, Rab family	0.806452	0.56	-0.31034	-0.836501	-0.549566
		EVDRNEGLK[+281.2]FAR	0.683226			0.806452	0.56	-0.31034	-0.836501	-0.549566	29.15	70.35
P62820	RAB1A	Average	0.835093	0.181422	small GTPases, Rab family	0.810185	0.86	-0.31855	-0.332487	-0.259992
		C[+57]DLTTK[+281.2]K	0.727963			0.925926	0.53	-0.111031	-0.915936	-0.458063	9.29	54.22
		SNVK[+281.2]IQSTPVK	0.942222			0.694444	1.19	-0.526069	0.250962	-0.0858607	17.25	60
Q9H0U4	RAB1B	Average	0.935769	#N/A	small GTPases, Rab family	0.961538	0.91	-0.0565835	-0.136062	-0.0957753
		SDLTTK[+281.2]K	0.935769			0.961538	0.91	-0.0565835	-0.136062	-0.0957753	6.27	51.81
Q9UL25	RAB21	Average	0.876927	#N/A	small GTPases, Rab family	0.807754	0.9461	-0.308011	-0.0799354	-0.189471
		VVLLGEGC[+57]VGK[+281.2]TSLVLR	0.876927			0.807754	0.9461	-0.308011	-0.0799354	-0.189471	77.84	106.46
#N/A	RAB26/37	Average	1.09258	#N/A	small GTPases, Rab family	1.51515	0.67	0.599462	-0.577767	0.127733
		L[+42]VGDSGVGK[+281.2]	1.09258			1.51515	0.67	0.599462	-0.577767	0.127733
P51159	RAB27A	Average	2.03551	#N/A	small GTPases, Rab family	2.27531	1.7957	1.18606	0.844546	1.02539
		FLALGDSGVGK[+281.2]TSVLYQYTDGK	2.03551			2.27531	1.7957	1.18606	0.844546	1.02539	84.56	111.21
P51157	RAB28	Average	1.39029	#N/A	small GTPases, Rab family	1.47059	1.31	0.556393	0.389567	0.47539
		IVVLGDGASGK[+281.2]TSLTTC[+57]FAQETFGK	1.39029			1.47059	1.31	0.556393	0.389567	0.47539	85.31	112.07
O14966	RAB29	Average	1.77103	0.256931	small GTPases, Rab family	1.88743	1.86	0.876462	#NUM!	0.824591
		VLVVGDAAVGK[+281.2]TSLVQR	1.44928			1.44928		0.535332	#NUM!	0.535332	58.83	92.23
		VLVVGDAAVGK[+281.2]TSLVQR	2.09279			2.32558	1.86	1.21759	0.895303	1.06543	58.83	92.23
P61019	RAB2A	Average	1.27924	#N/A	small GTPases, Rab family	1.76398	0.7945	0.818834	-0.331881	0.355287
		TASNVEEAFINTAK[+281.2]EIYEK	1.27924			1.76398	0.7945	0.818834	-0.331881	0.355287	107.2	129.14
#N/A	RAB2A/2B	Average	1.10738	#N/A	small GTPases, Rab family	1.02976	1.185	0.0211541	0.232439	0.14715
		SC[+57]LLLQFTDK[+281.2]R	1.27241			1.20482	1.34	0.268817	0.422233	0.347563	76.94	105.88
		SC[+57]LLLQFTDK[+281.2]R	0.94235			0.854701	1.03	-0.226509	0.0426443	-0.0856644	76.94	105.88
P20338	RAB4A	Average	1.13165	#N/A	small GTPases, Rab family	1.657	0.6063	0.728574	-0.721896	0.178428
		FK[+281.2]DDSNHTIGVEFGSK	1.13165			1.657	0.6063	0.728574	-0.721896	0.178428	36.42	75.89
#N/A	RAB5A/5B/5C	Average	0.772581	#N/A	small GTPases, Rab family	0.645161	0.9	-0.632268	-0.152003	-0.372243
		LVLLGESAVGK[+281.2]SSLVLR	0.772581			0.645161	0.9	-0.632268	-0.152003	-0.372243	85.94	112.24
P51148	RAB5C	Average	0.99604	#N/A	small GTPases, Rab family	0.84538	1.1467	-0.242328	0.197488	-0.00572442
		ADLASK[+281.2]R	0.99604			0.84538	1.1467	-0.242328	0.197488	-0.00572442	10.11	54.97
#N/A	RAB6A/6B	Average	0.985561	#N/A	small GTPases, Rab family	1.43802	0.5331	0.524085	-0.907522	-0.0209835
		LVFLGEQSVGK[+281.2]TSLITR	0.985561			1.43802	0.5331	0.524085	-0.907522	-0.0209835	78.94	107.03
#N/A	RAB6A/6C	Average	1.10525	#N/A	small GTPases, Rab family	1.16401	1.0465	0.219102	0.0655723	0.144379
		AGYNVK[+281.2]QLFR	1.10525			1.16401	1.0465	0.219102	0.0655723	0.144379	70.97	101.49
P51149	RAB7A	Average	0.652737	0.166578	small GTPases, Rab family	0.727948	0.577525	-0.459171	-0.899289	-0.615427
		FSNQYK[+281.2]ATIGADFLTK	0.741405			0.75861	0.7242	-0.398569	-0.46554	-0.431666	76.39	105.76
		NALK[+281.2]QETEVELYNEFPEPIK	0.659997			0.682594	0.6374	-0.550901	-0.649729	-0.599469	87.58	113.72
		VIILGDSGVGK[+281.2]TSLM[+16]NQYVNK	0.711897			0.735294	0.6885	-0.443607	-0.538471	-0.490259	60.56	93.99
		VIILGDSGVGK[+281.2]TSLMNQYVNK	0.497647			0.735294	0.26	-0.443607	-1.94342	-1.00681	76.39	105.33
P61006	RAB8A	Average	0.976949	#N/A	small GTPases, Rab family	1.4339	0.52	0.519942	-0.943416	-0.0336453
		ITPDQQK[+281.2]R	0.976949			1.4339	0.52	0.519942	-0.943416	-0.0336453	-1.69	46.9
#N/A	RAB8A/10	Average	0.716322	#N/A	small GTPases, Rab family	0.586545	0.8461	-0.769687	-0.2411	-0.481319
		LLLIGDSGVGK[+281.2]TC[+57]VLFR	0.716322			0.586545	0.8461	-0.769687	-0.2411	-0.481319	96.09	119.49
#N/A	RABL2A/L2B	Average	1.46279	#N/A	small GTPases, Rab family	2.32558	0.6	1.21759	-0.736966	0.548723
		IIC[+57]LGDSAVGK[+281.2]SK	1.46279			2.32558	0.6	1.21759	-0.736966	0.548723	39.8	78.37
Q3YEC7	RABL6	Average	1.07445	#N/A	small GTPases, others	1.0989	1.05	0.136062	0.0703893	0.103599
		K[+281.2]LVGSDQAPGR	1.07445			1.0989	1.05	0.136062	0.0703893	0.103599	14.23	58.25
P62826	RAN	Average	1.53552	0.196362	small GTPases, Ran family	1.69404	1.377	0.743078	0.396068	0.618725
		AK[+281.2]SIVFHR	1.36957			1.51263	1.2265	0.59706	0.294547	0.453718	25.25	67.67
		FNVWDTAGQEK[+281.2]FGGLR	1.89848			1.66306	2.1339	0.733843	1.09349	0.924846	81.33	108.98
		K[+281.2]NLQYYDISAK	1.22016			1.45222	0.9881	0.538262	-0.017271	0.287071	41.81	80.13
		LVLVGDGGTGK[+281.2]TTFVK	1.65386			2.14823	1.1595	1.10315	0.213503	0.72584	57.81	91.61
P61224	RAP1B	Average	1.20654	#N/A	small GTPases, Ras family	1.09818	1.3149	0.135111	0.394953	0.270874
		TPVPGK[+281.2]AR	1.20654			1.09818	1.3149	0.135111	0.394953	0.270874	6.3	53.31
Q96A58	RERG	Average	1.30906	#N/A	small GTPases, Ras family	1.05042	1.5677	0.0709665	0.64865	0.388531
		NILDEIK[+281.2]K	1.30906			1.05042	1.5677	0.0709665	0.64865	0.388531	66.18	97.94
P61586	RHOA	Average	1.29063	0.429735	small GTPases, Rho family	1.41778	1.16348	0.340928	0.165257	0.368071
		IGAFGYM[+16]EC[+57]SAK[+281.2]TK	0.848226			0.806452	0.89	-0.31034	-0.168123	-0.23748	36.55	76.08
		IGAFGYM[+16]EC[+57]SAK[+281.2]TK	0.81			0.8	0.82	-0.321928	-0.286304	-0.304006	36.55	76.08
		M[+16]K[+281.2]QEPVKPEEGR	1.93939			2.40848	1.4703	1.26812	0.556111	0.955602	-3.75	44.89
		MK[+281.2]QEPVKPEEGR	1.56489			1.65618	1.4736	0.727857	0.559345	0.64606	1.47	48.61
#N/A	RHOA/C	Average	0.763767	#N/A	small GTPases, Rho family	0.868734	0.6588	-0.203013	-0.602088	-0.388795
		K[+281.2]LVIVGDGAC[+57]GK	0.763767			0.868734	0.6588	-0.203013	-0.602088	-0.388795	38.75	77.81
P08134	RHOC	Average	0.837478	#N/A	small GTPases, Rho family	0.884956	0.79	-0.176323	-0.340075	-0.255877
		ISAFGYLEC[+57]SAK[+281.2]TK	0.837478			0.884956	0.79	-0.176323	-0.340075	-0.255877	65.28	96.93
Q9HBH0	RHOF	Average	0.888729	#N/A	small GTPases, Rho family	0.847458	0.93	-0.238787	-0.104697	-0.170185
		VALSALK[+281.2]K	0.888729			0.847458	0.93	-0.238787	-0.104697	-0.170185	36.69	75.92
P84095	RHOG	Average	1.74495	#N/A	small GTPases, Rho family	1.9972	1.4927	0.997982	0.577924	0.803187
		AVLNPTPIK[+281.2]R	1.74495			1.9972	1.4927	0.997982	0.577924	0.803187	32.48	72.53
Q8IXI2	RHOT1	Average	0.631458	0.335118	small GTPases, Rho family	0.775416	0.4875	-0.439568	-1.204	-0.663241
		EDHK[+281.2]SYYAINTVYVYGQEK	0.58729			0.934579	0.24	-0.0976108	-2.05889	-0.767856	53.89	88.65
		IREDHK[+281.2]SYYAINTVYVYGQEK	0.445415			0.460829	0.43	-1.1177	-1.21759	-1.16678	46.02	83.77
		NC[+57]GK[+281.2]SGVLQALLGR	0.861669			0.930839	0.7925	-0.103397	-0.335517	-0.214794	90.05	116.16
#N/A	RRAGC/D	Average	0.774906	#N/A	small GTPases, Ras family	0.885112	0.6647	-0.176067	-0.589225	-0.367906
		SGK[+281.2]SSIQK	0.774906			0.885112	0.6647	-0.176067	-0.589225	-0.367906	-4.27	45.31
Q9BST9	RTKN	Average	1.11967	0.227112	other GTP-binding proteins	1.08237	1.15697	0.110424	0.116299	0.163074
		EAQVLGK[+281.2]TSR	1.41318			1.07527	1.7511	0.104697	0.808261	0.49895	17.76	62.34
		EGAC[+57]K[+281.2]LLAAC[+57]SQR	0.98005			0.990099	0.97	-0.0143553	-0.0439433	-0.0290735	35.87	76.57
		LATK[+281.2]LSSSLGR	0.965777			1.18175	0.7498	0.240929	-0.415422	-0.0502382	37.92	77.58
Q9NR31	SAR1A	Average	1.94401	0.102352	small GTPases, Sar1/Arf family	2.42561	1.4624	1.21574	0.486857	0.959032
		GNVTLK[+281.2]ELNAR	2.0847			3.125	1.0444	1.64386	0.0626744	1.05984	38.34	78.11
		TDAISEEK[+281.2]LR	1.80331			1.72622	1.8804	0.787617	0.91104	0.850648	29.92	70.93
#N/A	SAR1A/1B	Average	1.10877	#N/A	small GTPases, Sar1/Arf family	1.15675	1.0608	0.207446	0.0819323	0.148966
		TTLLHM[+16]LK[+281.2]DDR	1.03848			1.08696	0.99	0.120294	-0.0144996	0.054471	45.74	83.62
		TTLLHMLK[+281.2]DDR	1.17907			1.22654	1.1316	0.294597	0.178364	0.237651	62.62	96.2
P49903	SEPHS1	Average	1.33359	#N/A	other GTP-binding proteins	1.59719	1.07	0.675535	0.0976108	0.41532
		FC[+57]AEIK[+281.2]SPK	1.33359			1.59719	1.07	0.675535	0.0976108	0.41532	29.05	70.32
Q9P0V9	SEPT10	Average	0.213297	0.499319	Septin	0.265293	0.1613	-2.12321	-2.64082	-2.22907
		LK[+281.2]AQTYELQESNVQLK	0.288606			0.398311	0.1789	-1.32803	-2.48277	-1.79283	43.1	81
		TELQK[+281.2]FK	0.137988			0.132275	0.1437	-2.91839	-2.79887	-2.85739	31.89	72.98
Q15019	SEPT2	Average	1.03939	0.0113794	Septin	1.27258	0.8062	0.347714	-0.311553	0.0557357
		ADTLTLK[+281.2]ER	1.04775			1.2631	0.8324	0.336974	-0.264651	0.0672978	32.53	73.38
		LLK[+281.2]ASIPFSVVGSNQLIEAK	1.03103			1.28205	0.78	0.358454	-0.358454	0.0440802	91.49	116.38
Q14141	SEPT6	Average	0.98005	#N/A	Septin	0.990099	0.97	-0.0143553	-0.0439433	-0.0290735
		SELTK[+281.2]FK	0.98005			0.990099	0.97	-0.0143553	-0.0439433	-0.0290735	35.91	74.66
Q16181	SEPT7	Average	0.741661	0.136056	Septin	0.753473	0.72985	-0.413605	-0.462754	-0.431168
		K[+281.2]TVQVEQSK	0.670309			0.689417	0.6512	-0.53655	-0.618827	-0.577102	5.03	51.41
		LK[+281.2]DSEAELQR	0.813014			0.817528	0.8085	-0.29066	-0.30668	-0.298648	16.46	61.59
Q9UHD8	SEPT9	Average	0.661307	0.217013	Septin	0.611264	0.71135	-0.725767	-0.509954	-0.596608
		DAGLK[+281.2]QAPASR	0.762785			0.700771	0.8248	-0.512985	-0.277884	-0.390651	12.75	58.4
		VPEVPTAPATDAAPK[+281.2]R	0.559829			0.521757	0.5979	-0.938549	-0.742024	-0.836943	27.13	68.86
P61011	SRP54	Average	1.87786	#N/A	other GTP-binding proteins	1.78571	1.97	0.836501	0.978196	0.909087
		VFSK[+281.2]QPGR	1.87786			1.78571	1.97	0.836501	0.978196	0.909087	15.36	60.51
Q9Y5M8	SRPRB	Average	1.00326	0.15197	small GTPases, others	0.999624	1.0069	-0.00148894	-0.0432184	0.00469818
		AVLLVGLC[+57]DSGK[+281.2]	0.890204			1.02041	0.76	0.0291463	-0.395929	-0.167792	67.89	98.92
		SAAPSTLDSSSTAPAQLGKK[+281.2]	0.942918			1.02934	0.8565	0.0417141	-0.223475	-0.0847957	26.99	68.34
		VEFLEC[+57]SAK[+281.2]GGR	1.17666			0.949127	1.4042	-0.0753273	0.489748	0.234702	40.53	79.78
Q96I99	SUCLG2	Average	1.07103	#N/A	other GTP-binding proteins	0.965158	1.1769	-0.0511633	0.234992	0.0989974
		GK[+281.2]GVFNSGLK	1.07103			0.965158	1.1769	-0.0511633	0.234992	0.0989974	37.06	76.45
P21980	TGM2	Average	0.0246848	0.833789	other GTP-binding proteins	0.015003	0.0343667	-6.0915	-5.54621	-5.34023
		ANHLNK[+281.2]LAEK	0.0152855			0.018471	0.0121	-5.75859	-6.36885	-6.03169	11.48	56.44
		FLK[+281.2]NAGR	0.0104807			0.0109613	0.01	-6.51144	-6.64386	-6.57613	18.38	61.95
		QEYVLTQQGFIYQGSAK[+281.2]FIK	0.0482884			0.0155767	0.081	-6.00447	-3.62593	-4.37218	80.78	108.79
Q9NWX6	THG1L	Average	0.967605	#N/A	other GTP-binding proteins	1.00331	0.9319	0.00476877	-0.101753	-0.0475092
		SK[+281.2]FEYVR	0.967605			1.00331	0.9319	0.00476877	-0.101753	-0.0475092	37.1	76.4
Q2NL82	TSR1	Average	1.30299	0.263091	other GTP-binding proteins	1.18891	1.41707	0.225646	0.453748	0.381826
		RDPGNTEPVK[+281.2]AK	0.94998			0.950661	0.9493	-0.0729976	-0.075064	-0.0740304	-5.4	43.56
		SQDTVLM[+16]NLYK[+281.2]R	1.63459			1.47907	1.7901	0.564691	0.84004	0.708925	54.99	89.5
		SQDTVLMNLYK[+281.2]R	1.3244			1.13701	1.5118	0.185245	0.596267	0.405344	65.55	97.55
#N/A	TUBA1A/1B/1C/3C/3E	Average	1.14138	#N/A	GTP-binding tubulin	1.06136	1.2214	0.0740617	0.229675	0.190782
		DVNAAIATIK[+281.2]TK	1.38009			1.19689	1.5633	0.259288	0.644595	0.464767	53.06	88.96
		TIGGGDDSFNTFFSETGAGK[+281.2]HVPR	0.90267			0.92584	0.8795	-0.111165	-0.185245	-0.147729	69.26	100.89
Q9BQE3	TUBA1C	Average	0.818373	#N/A	GTP-binding tubulin	0.808146	0.8286	-0.307312	-0.271252	-0.289169
		AYHEQLTVAEITNAC[+57]FEPANQM[+16]VK[+281.2]C[+57]DPR	0.818373			0.808146	0.8286	-0.307312	-0.271252	-0.289169	58.42	92.95
P68366	TUBA4A	Average	1.27277	0.262174	GTP-binding tubulin	1.16507	1.38047	0.174714	0.42038	0.347968
		DVNAAIAAIK[+281.2]TK	0.90227			0.791139	1.0134	-0.337996	0.0192037	-0.148369	61.08	95.47
		GDVVPK[+281.2]DVNAAIAAIK	1.54964			1.25078	1.8485	0.32283	0.886355	0.631934	75.51	105.46
		GHYTIGK[+281.2]EIIDPVLDR	1.36639			1.45328	1.2795	0.53931	0.35558	0.450368	67.34	98.94
P07437	TUBB	Average	1.12431	#N/A	GTP-binding tubulin	1.38562	0.863	0.470529	-0.212568	0.169038
		ISVYYNEATGGK[+281.2]YVPR	1.12431			1.38562	0.863	0.470529	-0.212568	0.169038	48.95	85.32
Q13885	TUBB2A	Average	0.236199	#N/A	GTP-binding tubulin	0.292398	0.18	-1.774	-2.47393	-2.08193
		INVYYNEAAGNK[+281.2]YVPR	0.236199			0.292398	0.18	-1.774	-2.47393	-2.08193	48.59	85.56
Q9BVA1	TUBB2B	Average	0.082521	#N/A	GTP-binding tubulin	0.110742	0.0543	-3.17473	-4.2029	-3.5991
		INVYYNEATGNK[+281.2]YVPR	0.082521			0.110742	0.0543	-3.17473	-4.2029	-3.5991
P68371	TUBB4B	Average	0.614594	#N/A	GTP-binding tubulin	0.699888	0.5293	-0.514804	-0.917842	-0.702294
		INVYYNEATGGK[+281.2]YVPR	0.614594			0.699888	0.5293	-0.514804	-0.917842	-0.702294	49.08	85.45
Q9UJT0	TUBE1	Average	3.0125	#N/A	GTP-binding tubulin	3.125	2.9	1.64386	1.53605	1.59096
		SLVTSSSGALK[+281.2]K	3.0125			3.125	2.9	1.64386	1.53605	1.59096	26.44	67.84
#N/A	TUBG1/2	Average	1.15	#N/A	GTP-binding tubulin	1.25	1.05	0.321928	0.0703893	0.201634
		K[+281.2]TTVLDVMR	1.15			1.25	1.05	0.321928	0.0703893	0.201634	57.4	91.35
P49411	TUFM	Average	1.36266	0.19821	elongation/initiation factors	1.36332	1.362	0.445016	0.380359	0.446428
		DPELGLK[+281.2]SVQK	1.46511			1.44363	1.4866	0.529697	0.572017	0.551012	40.85	79.33
		ILAEGGGAK[+281.2]FK	1.56654			1.37988	1.7532	0.464544	0.809991	0.647582	33.3	73.39
		K[+281.2]GDEC[+57]ELLGHSK	1.05633			1.26646	0.8462	0.340806	-0.240929	0.0790634	17.93	62.12

## Sheet: quantified proteins
Uniprot	Category	Protein Gene	log2(SW620/480)	ratio(SW620/480)
P62820	small GTPases, Rab family	RAB1A	-0.259992	0.835093		upregulated
Q9H0U4	small GTPases, Rab family	RAB1B	-0.0957753	0.935769		downregulated
P61019	small GTPases, Rab family	RAB2A	0.355287	1.27924
P20338	small GTPases, Rab family	RAB4A	0.178428	1.13165
P51148	small GTPases, Rab family	RAB5C	-0.00572442	0.99604
P51149	small GTPases, Rab family	RAB7A	-0.615427	0.652737
P61006	small GTPases, Rab family	RAB8A	-0.0336453	0.976949
P61026	small GTPases, Rab family	RAB10	-0.0837169	0.943623
Q6IQ22	small GTPases, Rab family	RAB12	-2.20393	0.217046
P51153	small GTPases, Rab family	RAB13	0.0979179	1.07023
P61106	small GTPases, Rab family	RAB14	-0.345358	0.787113
Q9NP72	small GTPases, Rab family	RAB18	-0.549566	0.683226
Q9UL25	small GTPases, Rab family	RAB21	-0.189471	0.876927
P51159	small GTPases, Rab family	RAB27A	1.02539	2.03551
P51157	small GTPases, Rab family	RAB28	0.47539	1.39029
O14966	small GTPases, Rab family	RAB29	0.824591	1.77103
P60953	small GTPases, Rho family	CDC42	0.428935	1.34624
P61586	small GTPases, Rho family	RHOA	0.368071	1.29063
P08134	small GTPases, Rho family	RHOC	-0.255877	0.837478
Q9HBH0	small GTPases, Rho family	RHOF	-0.170185	0.888729
P84095	small GTPases, Rho family	RHOG	0.803187	1.74495
Q8IXI2	small GTPases, Rho family	RHOT1	-0.663241	0.631458
P61224	small GTPases, Ras family	RAP1B	0.270874	1.20654
Q96A58	small GTPases, Ras family	RERG	0.388531	1.30906
P36404	small GTPases, Sar1/Arf family	ARL2	1.56465	2.95806
Q9NR31	small GTPases, Sar1/Arf family	SAR1A	0.959032	1.94401
P62826	small GTPases, Ran family	RAN	0.618725	1.53552
Q96P47	small GTPases, others	AGAP3	1.84916	3.60289
Q3YEC7	small GTPases, others	RABL6	0.103599	1.07445
Q9Y5M8	small GTPases, others	SRPRB	0.00469818	1.00326
Q15019	Septin	SEPT2	0.0557357	1.03939
Q14141	Septin	SEPT6	-0.0290735	0.98005
Q16181	Septin	SEPT7	-0.431168	0.741661
Q9UHD8	Septin	SEPT9	-0.596608	0.661307
Q9P0V9	Septin	SEPT10	-2.22907	0.213297
Q5VTE0	elongation/initiation factors	EEF1A1P5	0.629008	1.5465
Q05639	elongation/initiation factors	EEF1A2	0.0283334	1.01983
P13639	elongation/initiation factors	EEF2	0.0148787	1.01037
P57772	elongation/initiation factors	EEFSEC	0.179702	1.13265
Q15029	elongation/initiation factors	EFTUD2	0.202216	1.15046
P41091	elongation/initiation factors	EIF2S3	0.175141	1.12907
P55010	elongation/initiation factors	EIF5	-0.36332	0.777374
O60841	elongation/initiation factors	EIF5B	-0.0572492	0.961095
Q96RP9	elongation/initiation factors	GFM1	-0.507874	0.703258
P15170	elongation/initiation factors	GSPT1	0.51754	1.43151
Q8N442	elongation/initiation factors	GUF1	0.296365	1.22805
Q9Y450	elongation/initiation factors	HBS1L	0.886295	1.84842
P46199	elongation/initiation factors	MTIF2	0.460417	1.37594
P49411	elongation/initiation factors	TUFM	0.446428	1.36266
Q14344	G-alpha	GNA13	0.973713	1.96389
Q05193	Dynamin and dynamin like	DNM1	0.70046	1.62502
O00429	Dynamin and dynamin like	DNM1L	0.551448	1.46556
P50570	Dynamin and dynamin like	DNM2	0.757851	1.69097
Q9H4M9	Dynamin and dynamin like	EHD1	0.146262	1.1067
Q9H223	Dynamin and dynamin like	EHD4	0.173053	1.12744
O60313	Dynamin and dynamin like	OPA1	0.00607346	1.00422
Q9BQE3	GTP-binding tubulin	TUBA1C	-0.289169	0.818373
P68366	GTP-binding tubulin	TUBA4A	0.347968	1.27277
P07437	GTP-binding tubulin	TUBB	0.169038	1.12431
Q13885	GTP-binding tubulin	TUBB2A	-2.08193	0.236199
Q9BVA1	GTP-binding tubulin	TUBB2B	-3.5991	0.082521
P68371	GTP-binding tubulin	TUBB4B	-0.702294	0.614594
Q9UJT0	GTP-binding tubulin	TUBE1	1.59096	3.0125
P30520	other GTP-binding proteins	ADSS	0.128393	1.09308
Q8N142	other GTP-binding proteins	ADSSL1	-0.697744	0.616535
Q9UIJ7	other GTP-binding proteins	AK3	-0.76256	0.58945
P27144	other GTP-binding proteins	AK4	-0.903163	0.534713
P08133	other GTP-binding proteins	ANXA6	-2.44898	0.18314
Q9NRY4	other GTP-binding proteins	ARHGAP35	-0.149362	0.901649
Q13017	other GTP-binding proteins	ARHGAP5	0.159238	1.1167
Q9Y295	other GTP-binding proteins	DRG1	0.240337	1.18127
P55039	other GTP-binding proteins	DRG2	0.326797	1.25423
O75616	other GTP-binding proteins	ERAL1	0.371094	1.29333
Q02790	other GTP-binding proteins	FKBP4	0.114764	1.0828
O14772	other GTP-binding proteins	FPGT	1.33953	2.53068
P00367	other GTP-binding proteins	GLUD1	1.38548	2.61259
Q96IJ6	other GTP-binding proteins	GMPPA	0.181677	1.1342
Q9Y5P6	other GTP-binding proteins	GMPPB	-0.569162	0.674008
Q9BVP2	other GTP-binding proteins	GNL3	1.42582	2.68667
O00178	other GTP-binding proteins	GTPBP1	0.306978	1.23711
A4D1E9	other GTP-binding proteins	GTPBP10	-0.36268	0.777718
P08238	other GTP-binding proteins	HSP90AB1	0.880686	1.84125
Q9BW83	other GTP-binding proteins	IFT27	0.432886	1.34993
Q9NS86	other GTP-binding proteins	LANCL2	0.226309	1.16984
Q9H089	other GTP-binding proteins	LSG1	-0.327895	0.796698
Q8IVH4	other GTP-binding proteins	MMAA	0.258606	1.19632
Q14978	other GTP-binding proteins	NOLC1	-0.0572028	0.961126
Q9NTK5	other GTP-binding proteins	OLA1	-0.544441	0.685657
Q16822	other GTP-binding proteins	PCK2	0.328469	1.25568
Q9BST9	other GTP-binding proteins	RTKN	0.163074	1.11967
P49903	other GTP-binding proteins	SEPHS1	0.41532	1.33359
P61011	other GTP-binding proteins	SRP54	0.909087	1.87786
Q96I99	other GTP-binding proteins	SUCLG2	0.0989974	1.07103
P21980	other GTP-binding proteins	TGM2	-5.34023	0.0246848
Q9NWX6	other GTP-binding proteins	THG1L	-0.0475092	0.967605
Q2NL82	other GTP-binding proteins	TSR1	0.381826	1.30299
	proteins without unique peptides:
	G-alpha	GNAI1/2	1.78512	3.44646
	G-alpha	GNA11/14/Q	-0.290748	0.817478
	G-alpha	GNA12/13	0.945215	1.92548
	G-alpha	GNAS, GNAL, GNAI1/2/3, GNAT1/2/3, GNAO1	1.50404	2.83636
	small GTPases, Rab family	RAB11A/11B	0.427534	1.34493
	small GTPases, Rab family	RAB26/37	0.127733	1.09258
	small GTPases, Rab family	RAB2A/2B	0.14715	1.10738
	small GTPases, Rab family	RAB5A/5B/5C	-0.372243	0.772581
	small GTPases, Rab family	RAB6A/6B	-0.0209835	0.985561
	small GTPases, Rab family	RAB6A/6C	0.144379	1.10525
	small GTPases, Rab family	RAB8A/10	-0.481319	0.716322
	small GTPases, Rab family	RABL2A/L2B	0.548723	1.46279
	small GTPases, Rho family	RHOA/C	-0.388795	0.763767
	small GTPases, Ras family	RRAGC/D	-0.367906	0.774906
	small GTPases, Sar1/Arf family	SAR1A/1B	0.148966	1.10877
	GTP-binding tubulin	TUBA1A/1B/1C/3C/3E	0.190782	1.14138
	GTP-binding tubulin	TUBG1/2	0.201634	1.15

## Sheet: iRT for all peptides
peptide sequence	iRT
VPIILVGNK[+281.2]SDLR	67.89
EAHQK[+281.2]AR	-23.84
AK[+281.2]QKEEEEK	-21.62
SLGEK[+281.2]M[+16.0]K	-21.02
K[+281.2]SGGAGK	-20.19
K[+281.2]AAGAGK	-19.26
EK[+281.2]C[+57.0]SAGSQK	-17.06
K[+281.2]APTSSSQR	-15.83
GEK[+281.2]C[+57.0]EM[+16.0]K	-14.75
SESTAAAEHK[+281.2]GK	-14.73
TLEK[+281.2]NKK	-14.06
PNTAM[+16.0]K[+281.2]K	-14.04
M[+16.0]EESK[+281.2]AK	-13.9
PNTAM[+16.0]KK[+281.2]	-12.22
K[+281.2]AM[+16.0]EGAGTDEK	-12.1
SGSGK[+281.2]TSM[+16.0]R	-11.64
EQEPQK[+281.2]SK	-11.14
C[+57.0]TAASQGQK[+281.2]R	-11.11
GTK[+281.2]APQAAGK	-9.77
VQK[+281.2]EQADK	-9.65
EDGEK[+281.2]AAR	-9.22
K[+281.2]QLQDKR	-8.61
NPPENSDSGTGK[+281.2]K	-8.55
C[+57.0]SAGSQK[+281.2]AGSGEGPGK	-8.44
K[+281.2]QSGGAGQYGK	-8.39
TM[+16.0]HK[+281.2]YEQESK	-8.03
VVM[+16.0]K[+281.2]QSK	-7.44
YEQESK[+281.2]K	-7.32
GPVSM[+16.0]K[+281.2]GK	-5.97
HK[+281.2]HGLVER	-5.94
PVTK[+281.2]TSQR	-5.77
LSTRPVTK[+281.2]TSQR	-5.7
STGEVTK[+281.2]K	-5.67
RDPGNTEPVK[+281.2]AK	-5.4
VGNK[+281.2]M[+16.0]VK	-5.15
AAGAGK[+281.2]VTK	-5.12
SGGAGK[+281.2]VTK	-4.42
SGK[+281.2]SSIQK	-4.27
M[+16.0]K[+281.2]QEPVKPEEGR	-3.75
IVSQK[+281.2]QM[+16.0]SDR	-3.36
IGNK[+281.2]M[+16.0]AK	-3.01
K[+281.2]NIQDNR	-2.95
GM[+16.0]LK[+281.2]TSK	-2.76
SQLSSTK[+281.2]SK	-2.24
M[+16.0]K[+281.2]QEPVR	-2.13
ITPDQQK[+281.2]R	-1.69
LVEEDK[+281.2]HK	-1.53
QTPK[+281.2]EGVK	-1.14
NK[+281.2]QKPITPETAEK	-0.87
M[+16.0]VATTK[+281.2]PK	-0.73
GHEDK[+281.2]IR	-0.53
K[+281.2]TPVPGK	-0.48
K[+281.2]QTIGNSC[+57.0]K	-0.43
LTGK[+281.2]AEGGK	-0.41
ASNDRPPGAGGVK[+281.2]R	-0.4
ASQK[+281.2]LSSK	-0.3
M[+16.0]K[+281.2]QEPVRSEEGR	-0.02
M[+16.0]KQEPVK[+281.2]PEEGR	0.42
K[+281.2]LEDNPK	0.46
HSIDK[+281.2]VTSR	0.89
M[+16.0]GPGATAGGAEK[+281.2]SNVK	0.94
LIK[+281.2]HAVQER	1.16
K[+281.2]AMEGAGTDEK	1.19
K[+281.2]LEGNSPQGSNQGVK	1.3
MK[+281.2]QEPVKPEEGR	1.47
NLREDGEK[+281.2]AAR	1.67
TMHK[+281.2]YEQESK	2.01
TVDTK[+281.2]QAHELAK	2.26
NK[+281.2]GQLTK	2.47
VAVIHQM[+16.0]K[+281.2]EDQSK	2.77
GVK[+281.2]LSHR	2.8
SQK[+281.2]DIEGK	2.98
FLHTK[+281.2]NK	3.22
GK[+281.2]GEQIAR	3.25
ISGVNAK[+281.2]K	3.28
VDIK[+281.2]DRK	3.35
NLREDGEK[+281.2]AAK	3.38
K[+281.2]LKSAPDQEVR	3.55
DGSGQEK[+281.2]YR	4.04
LNDRYPK[+281.2]K	4.47
K[+281.2]TVQVEQSK	5.03
STIVK[+281.2]QM[+16.0]R	5.33
FAEK[+281.2]HNFAKPNDSR	5.41
VYK[+281.2]NELHR	5.56
HNFAK[+281.2]PNDSR	5.72
LQVK[+281.2]EHQHEEIQNVR	5.86
QEQAGK[+281.2]NLGTTK	5.99
K[+281.2]FEDSEK	6.1
GLC[+57.0]SK[+281.2]GQPR	6.24
SDLTTK[+281.2]K	6.27
TPVPGK[+281.2]AR	6.3
SK[+281.2]GQSSLALHK	7.06
SPAVK[+281.2]PAAAPK	7.33
IAAQAVTK[+281.2]NC[+57.0]QK	7.37
K[+281.2]STSNFK	7.61
TGEK[+281.2]AVVR	7.74
SSK[+281.2]GHLLK	8.07
NLEAQHK[+281.2]ELEEK	8.23
MGPGATAGGAEK[+281.2]SNVK	8.57
K[+281.2]LNIGGK	8.57
C[+57.0]C[+57.0]AFSNSK[+281.2]K	8.61
IVSQK[+281.2]QMSDR	8.71
KVTK[+281.2]GNVTIK	8.74
TDPK[+281.2]DVAR	8.76
EK[+281.2]ELEEEKK	9.12
EAEESSK[+281.2]IR	9.15
ALPQNK[+281.2]PR	9.27
C[+57.0]DLTTK[+281.2]K	9.29
GPLQTK[+281.2]AK	9.32
K[+281.2]GAQLPR	9.63
K[+281.2]SVSQVTK	9.8
K[+281.2]VVSVSR	10
ADLASK[+281.2]R	10.11
K[+281.2]ASAVNMEK	10.26
FATGK[+281.2]SC[+57.0]GPR	10.63
LISK[+281.2]TGGQR	10.9
TVELQGK[+281.2]K	10.91
K[+281.2]EGSDGPLATSKPVPAEK	10.93
ADTISK[+281.2]SELHK	11.47
KLEGNSPQGSNQGVK[+281.2]ITPDQQK	11.48
ANHLNK[+281.2]LAEK	11.48
ADTIAK[+281.2]NELHK	11.72
LVQQNQLKK[+281.2]	11.94
PGSAAK[+281.2]GSELSER	12
AAGQYSTSYAQQK[+281.2]R	12
LK[+281.2]SAPDQEVR	12.03
SK[+281.2]LATPEDK	12.03
DKNEATVSTGK[+281.2]IAK	12.2
LVQQNQLK[+281.2]K	12.31
K[+281.2]SPYLPSAHR	12.34
GAGESGK[+281.2]STIVK	12.65
FSK[+281.2]SATSPEGK	12.72
DAGLK[+281.2]QAPASR	12.75
VVGK[+281.2]EQGQNLAR	12.86
KM[+16.0]NDSNSAGAGGPVK[+281.2]ITENR	12.96
VK[+281.2]SQGAC[+57.0]VTPASGC[+57.0]	12.99
K[+281.2]LNVNAK	13
MGHAGAIIAGGK[+281.2]GGAK	13.23
K[+281.2]FSNQYK	13.4
GAGTDEK[+281.2]TLTR	13.44
SK[+281.2]SFNDPR	13.75
LGK[+281.2]NSNFAK	13.9
AIK[+281.2]EGDLSTK	13.95
TISVDGNK[+281.2]AK	14.23
K[+281.2]LVGSDQAPGR	14.23
LK[+281.2]VSGNQHEELQNVR	14.29
K[+281.2]EAVLAEK	14.29
EGFQK[+281.2]ESR	14.33
TK[+281.2]NFNPPTR	14.35
K[+281.2]EQIPLKPK	14.6
TK[+281.2]ILM[+16.0]NSSR	14.6
SVVAPPGAPKK[+281.2]	14.78
K[+281.2]GFSLGSTVQSHTK	14.88
QK[+281.2]PITPETAEK	14.91
IVSQK[+281.2]QIADR	15.02
K[+281.2]DLHMER	15.02
EEFIQK[+281.2]HGR	15.14
YSQDSFSK[+281.2]HYK	15.23
ASLK[+281.2]TLHR	15.27
VIK[+281.2]QSSLQK	15.28
VFSK[+281.2]QPGR	15.36
LQVK[+281.2]QNQHEELQNVR	15.57
K[+281.2]LQQYPR	15.7
AAATK[+281.2]LASAEK	15.74
DPQTPVLQTK[+281.2]HR	15.88
HLTGEFEK[+281.2]K	16.15
SK[+281.2]KPVIIAATK	16.32
LLQQDK[+281.2]ASLTR	16.41
LGSQTLTK[+281.2]TC[+57.0]SK	16.42
LK[+281.2]DSEAELQR	16.46
TGK[+281.2]SYLM[+16.0]NK	16.94
LPK[+281.2]QQLR	16.94
HTVDIEEK[+281.2]GVK	16.96
GVGK[+281.2]TSLM[+16.0]ER	17.07
TGK[+281.2]SYLM[+16.0]NR	17.14
SNVK[+281.2]IQSTPVK	17.25
QDLPDAM[+16.0]K[+281.2]PHEIQEK	17.42
AVFGK[+281.2]SAM[+16.0]K	17.42
EAEKELHEK[+281.2]FDR	17.55
TVDTK[+281.2]QAQDLAR	17.62
EAQVLGK[+281.2]TSR	17.76
VKEK[+281.2]EAILK	17.9
AVIM[+16.0]GAPGSGK[+281.2]GTVSSR	17.93
K[+281.2]GDEC[+57.0]ELLGHSK	17.93
K[+281.2]GIGPTYSSK	18.03
ELK[+281.2]QYDNK	18.03
LPTEMEGK[+281.2]K	18.03
SQLDINNK[+281.2]K	18.21
LEGNSPQGSNQGVK[+281.2]ITPDQQK	18.21
AVIK[+281.2]ALDEK	18.31
FLK[+281.2]HIER	18.36
FLK[+281.2]NAGR	18.38
LNIGGK[+281.2]R	18.4
DIHEELPK[+281.2]R	18.58
VGNK[+281.2]LVR	18.66
EVPLK[+281.2]DAK	18.86
K[+281.2]GSVLVAGK	18.96
RVELSGPK[+281.2]AAEPVSR	19.07
K[+281.2]NAAPFR	19.13
K[+281.2]VVDYTTAK	19.33
K[+281.2]IPQQLESK	19.41
KIQK[+281.2]FENQYR	19.47
TSLM[+16.0]NQYVNKK[+281.2]	19.48
VLK[+281.2]SVAVK	19.6
ISVYYNEASSHK[+281.2]	19.79
GQTPEAGADK[+281.2]R	20.03
HEAEK[+281.2]LAAAYGM[+16.0]K	20.09
FAK[+281.2]GVQYNM[+16.0]K	20.09
RGVEIEEGGVK[+281.2]VK	20.29
YVSK[+281.2]ELAK	20.4
AAAQLLQSQAQQSGAQQTK[+281.2]K	20.4
K[+281.2]ITVVPSAK	20.5
M[+16.0]K[+281.2]TGLIDK	20.5
GM[+16.0]EK[+281.2]SNK	20.55
K[+281.2]YEEIDNAPEER	20.68
M[+16.0]TLK[+281.2]QLK	20.8
KSPDSDVAATLK[+281.2]K	20.82
VTK[+281.2]GNVTIK	21.22
SVAVK[+281.2]LGK	21.51
YC[+57.0]ENK[+281.2]FNDK	22.15
C[+57.0]NVIGVK[+281.2]NC[+57.0]GK	22.15
K[+281.2]VENEDM[+16.0]NKDQILLEK	22.29
APQAAGK[+281.2]IHTDFEK	22.34
TIEAGIGK[+281.2]NPR	22.64
ESLDTTC[+57.0]K[+281.2]EISR	22.65
FTELK[+281.2]GTGC[+57.0]K	22.84
K[+281.2]VGFSPK	22.97
ITPVTVK[+281.2]AQTK	23
SK[+281.2]IEDIR	23.04
SVIVPSGAPK[+281.2]K	23.08
K[+281.2]VGFNPK	23.15
VGFNPK[+281.2]K	23.19
YVFDTHK[+281.2]R	23.2
K[+281.2]LAEQEAHYAVR	23.25
K[+281.2]YPSLANR	23.38
FEDLNK[+281.2]R	23.52
VK[+281.2]NIIHEEVEK	23.57
FSK[+281.2]GIGR	23.7
SVIVPSGAPKK[+281.2]	23.7
GGK[+281.2]GLLPVR	23.74
SFLEDTTPARDEK[+281.2]K	23.92
EVSAYIK[+281.2]K	23.97
LDGHAK[+281.2]GGGALSAVAATK	24.38
GPVTIVSGKK[+281.2]	24.46
ALQK[+281.2]LQAER	24.48
LLK[+281.2]TSM[+16.0]LK	24.62
IHK[+281.2]NLIK	24.76
LK[+281.2]HGQFTLR	24.76
KGIQAK[+281.2]EVLK	24.92
TPQDPSSVLKK[+281.2]	25.03
DTEYFK[+281.2]NK	25.03
K[+281.2]GTSQKDETFNLPR	25.17
AK[+281.2]SIVFHR	25.25
ITK[+281.2]GNVTIK	25.29
LK[+281.2]EQGQAPITPQQGQALAK	25.3
AQLLEPSK[+281.2]SASSK	25.34
QQQQQQNDVVK[+281.2]LTK	25.72
LQC[+57.0]K[+281.2]GHGEC[+57.0]PTTENTETFIR	25.85
LSLAEATKK[+281.2]	25.9
NLK[+281.2]LGIHEDSTNR	25.94
VFKEEK[+281.2]YLK	25.98
FEK[+281.2]GNC[+57.0]GVSIM[+16.0]R	26.13
EGKPLLK[+281.2]AVM[+16.0]R	26.17
SLVTSSSGALKK[+281.2]	26.3
SLVTSSSGALK[+281.2]K	26.44
SITHDIEEK[+281.2]GVR	26.81
SLDYVK[+281.2]R	26.85
SAAPSTLDSSSTAPAQLGKK[+281.2]	26.99
VPEVPTAPATDAAPK[+281.2]R	27.13
QKPITPETAEK[+281.2]LAR	27.26
AAVVVSK[+281.2]SGSLK	27.4
LNSKPPNIGFK[+281.2]K	27.54
EGIDK[+281.2]IR	27.54
IQK[+281.2]FENQYR	27.55
IK[+281.2]TVELQGK	27.76
FLHK[+281.2]PSIEK	27.77
SK[+281.2]SVIVPSGAPK	27.77
IVC[+57.0]YEEK[+281.2]QIQAK	27.77
KTAAELLQSQGSQAGGSQTLK[+281.2]R	27.95
KLPK[+281.2]NEPQNPGANSAR	28.05
K[+281.2]GIGPVYSSK	28.09
GIGPVYSSK[+281.2]AAR	28.36
AYFETEKK[+281.2]	28.36
NIGIM[+16.0]AHIDAGK[+281.2]TTTTER	28.46
GFSLGSTVQSHTK[+281.2]	28.59
K[+281.2]LYC[+57.0]QELK	28.68
VNK[+281.2]VIIGTK	28.7
K[+281.2]AAAQLLQSQAQQSGAQQTK	28.73
SIK[+281.2]ENASAGVER	28.73
NVYK[+281.2]DLR	28.77
EYGC[+57.0]PC[+57.0]ITGK[+281.2]PK	28.77
K[+281.2]LANFPR	28.88
IIEVSGQKIK[+281.2]	28.95
FC[+57.0]AEIK[+281.2]SPK	29.05
M[+58.0]RK[+281.2]PDSK	29.13
NGFSLGSTVK[+281.2]SHTK	29.15
EVDRNEGLK[+281.2]FAR	29.15
K[+281.2]HSM[+16.0]LFIEASAK	29.23
EAAELPMVIC[+57.0]GNK[+281.2]	29.66
AVIMGAPGSGK[+281.2]GTVSSR	29.74
ISVYYNEATGGK[+281.2]	29.84
K[+281.2]KNLQYYDISAK	29.87
TDAISEEK[+281.2]LR	29.92
SIVK[+281.2]EC[+57.0]GNR	29.97
ADAISK[+281.2]SELTK	29.97
VESK[+281.2]TVIVTPSQR	30.7
IPK[+281.2]TVEIK	30.83
GLFK[+281.2]GGDM[+16.0]SK	30.93
K[+281.2]VENEDMNKDQILLEK	31.01
WVGVGK[+281.2]SR	31.11
GVVQVEK[+281.2]IK	31.2
GYLSK[+281.2]VR	31.48
GTVYFK[+281.2]EGK	31.66
GTGC[+57.0]K[+281.2]VPQDVLQK	31.75
LQTPNTFPK[+281.2]R	31.79
EVEEYK[+281.2]NFRPDDPAR	31.87
TELQK[+281.2]FK	31.89
K[+281.2]VFPVSR	32.16
IIEVSGQK[+281.2]IK	32.16
LLQPK[+281.2]NVM[+16.0]VSTGR	32.16
IDLVK[+281.2]ESQAK	32.21
AGVGK[+281.2]SALVVR	32.44
AVLNPTPIK[+281.2]R	32.48
ADTLTLK[+281.2]ER	32.53
LK[+281.2]DIDEDFKR	32.57
VIPGAAEK[+281.2]IER	32.57
TIELDGK[+281.2]R	32.99
K[+281.2]TTVLDVM[+16.0]R	33.12
IYK[+281.2]LDDPSC[+57.0]PRPEC[+57.0]YR	33.17
ILAEGGGAK[+281.2]FK	33.3
IK[+281.2]M[+16.0]FNQDIEK	33.35
K[+281.2]GGDGIKPPPIIGR	33.4
K[+281.2]HISDGVADSGLTLK	33.67
ALSTTASTAAFDK[+281.2]QPQSR	33.71
IVLVGK[+281.2]TGSGK	33.78
TAAELLQSQGSQAGGSQTLK[+281.2]R	33.81
SK[+281.2]TLFSK	34.4
VDEVMTK[+281.2]EIK	34.5
GVGK[+281.2]TSLMER	34.68
LLNLK[+281.2]DK	34.77
VPVGTLVK[+281.2]EGGR	34.84
ISVYYNEASSHK[+281.2]YVPR	34.91
SASSK[+281.2]GEGFDVMK	34.94
GTVRPANDFNPDADAK[+281.2]ALR	34.95
GGQTASFALK[+281.2]K	34.95
AYEDQTKPVLEYYQKK[+281.2]	35.09
STNLQPYIK[+281.2]R	35.09
INPK[+281.2]NYTDNELEK	35.09
EVEEYK[+281.2]NFRPDDPTR	35.19
QDLPDAMK[+281.2]PHEIQEK	35.4
FLEENK[+281.2]IK	35.46
AVK[+281.2]YVEC[+57.0]SALTQK	35.5
INAEIEK[+281.2]QLR	35.59
GNK[+281.2]VNEVLNR	35.59
KLEDGPK[+281.2]FLK	35.64
IYSQK[+281.2]IGIK	35.73
L[+42.0]VGDSGVGK[+281.2]	35.73
K[+281.2]M[+16.0]YSEIDIK	35.77
EGAC[+57.0]K[+281.2]LLAAC[+57.0]SQR	35.87
SELTK[+281.2]FK	35.91
QM[+16.0]IGYNLATK[+281.2]QTPK	36.05
VK[+281.2]AEPFIK	36.13
VGQEIEVRPGIVSK[+281.2]DSEGK	36.18
ETITKPPK[+281.2]VDM[+16.0]VNEEIGK	36.27
FK[+281.2]DDSNHTIGVEFGSK	36.42
K[+281.2]EDLYLKPIQR	36.46
SAK[+281.2]LIQQQLEK	36.46
IC[+57.0]EK[+281.2]STK	36.53
IGAFGYM[+16.0]EC[+57.0]SAK[+281.2]TK	36.55
VALSALK[+281.2]K	36.69
ILTPALKK[+281.2]	36.87
GK[+281.2]GVFNSGLK	37.06
M[+16.0]DSESLFK[+281.2]DGK	37.1
K[+281.2]AIHEVFEVR	37.1
SK[+281.2]FEYVR	37.1
LNSK[+281.2]PPNIGFK	37.21
AQK[+281.2]SLLYR	37.34
VALSALKK[+281.2]	37.5
DK[+281.2]NIPAGLQSM[+16.0]NQALQR	37.51
KGTSQK[+281.2]DETFNLPR	37.52
SPAFALK[+281.2]NR	37.79
LATK[+281.2]LSSSLGR	37.92
TGK[+281.2]SYLMNK	38.06
LHEENK[+281.2]QFLC[+57.0]IPR	38.2
GNVTLK[+281.2]ELNAR	38.34
HTATGDTIVSSK[+281.2]SSALAAAR	38.47
ISEIEK[+281.2]EIAR	38.52
EFGLC[+57.0]K[+281.2]TENK	38.61
AVILGPPGSGK[+281.2]GTVC[+57.0]QR	38.66
IILVGK[+281.2]TGC[+57.0]GK	38.68
NIGISAHIDSGK[+281.2]TTLTER	38.75
K[+281.2]LVIVGDGAC[+57.0]GK	38.75
ELQAK[+281.2]FEHLK	38.81
DIQSLPQK[+281.2]AAVR	38.93
NTK[+281.2]IIC[+57.0]QGFTGK	39.12
SK[+281.2]LPNTVLGK	39.2
TGK[+281.2]SYLMNR	39.26
YVEC[+57.0]SALTQK[+281.2]GLK	39.34
GNFK[+281.2]LVR	39.39
SK[+281.2]KDDINLLPSK	39.44
K[+281.2]ATKGIVEHDFVIK	39.47
IK[+281.2]SPEDHIGAVLER	39.71
NAGGGGLENALSK[+281.2]GR	39.71
IPK[+281.2]TIEIK	39.71
K[+281.2]MYSEIDIK	39.73
IIC[+57.0]LGDSAVGK[+281.2]SK	39.8
SC[+57.0]LLHQFTEK[+281.2]K	39.82
EISYAIK[+281.2]NIHGVR	39.84
INPK[+281.2]NYTENELEK	39.84
M[+16.0]GGK[+281.2]DFSFR	39.89
QTVAVGVIK[+281.2]AVDKK	39.89
GQLTK[+281.2]SPLAQMEEERR	39.96
IK[+281.2]LLTGK	39.98
DDPSTIEK[+281.2]LAK	40
IAALK[+281.2]NELR	40.06
GK[+281.2]GLEGWEK	40.44
QGILLK[+281.2]R	40.44
VEFLEC[+57.0]SAK[+281.2]GGR	40.53
GIAGEK[+281.2]FDIVKK	40.65
NTELELQDPGQVEK[+281.2]EIHK	40.68
NTELELQDPGQVEKEIHK[+281.2]	40.68
VLQLYPNNKAAK[+281.2]	40.71
QLALDHFKK[+281.2]	40.85
DPELGLK[+281.2]SVQK	40.85
GK[+281.2]PLAFR	41.2
EVAIK[+281.2]QFR	41.45
GNFEHLTEK[+281.2]IR	41.73
K[+281.2]NLQYYDISAK	41.81
NM[+16.0]SVIAHVDHGK[+281.2]STLTDSLVC[+57.0]K	41.95
LK[+281.2]AYEDQTKPVLEYYQK	42.09
K[+281.2]VVDNTTAK	42.18
NFSIVAHVDHGK[+281.2]STLADR	42.45
AVLSSSK[+281.2]LIK	42.5
ETITKPPK[+281.2]VDMVNEEIGK	42.59
K[+281.2]KELVNNLGEIYQK	42.63
K[+281.2]HLEINPDHPIVETLR	42.77
YVAAAFPSAC[+57.0]GK[+281.2]	42.77
IYEFPETDDEEENKLVKK[+281.2]	42.78
NNLK[+281.2]EC[+57.0]GLY	42.86
K[+281.2]FFLSHPSYR	43
GIVEHDFVIK[+281.2]K	43
LK[+281.2]AQTYELQESNVQLK	43.1
YK[+281.2]QALLQYK	43.18
LK[+281.2]LVNPSQYR	43.2
DILLK[+281.2]SGGR	43.32
AGSEGLQQVVGMK[+281.2]K	43.35
INVYYNESSSQK[+281.2]YVPR	43.41
RK[+281.2]EFLSELQR	43.46
ANK[+281.2]DSLYKPILR	43.97
NSFGLK[+281.2]YLHK	44.1
YATM[+16.0]AFGVQDNLK[+281.2]K	44.14
GGVHLTK[+281.2]DPNVVGQLAK	44.14
EHQISPGDFPNLK[+281.2]R	44.23
IYQNIQDGSLDLNAAESGVQHK[+281.2]PSAPQGGR	44.23
ATEYHLGLLK[+281.2]AK	44.48
YLAEK[+281.2]YLQK	44.65
K[+281.2]LDPNLLK	45.06
K[+281.2]ALVSSESYLQR	45.2
MDSESLFK[+281.2]DGK	45.33
IK[+281.2]LQTPNTFPK	45.52
K[+281.2]LLETKPEFLK	45.74
TTLLHM[+16.0]LK[+281.2]DDR	45.74
IREDHK[+281.2]SYYAINTVYVYGQEK	46.02
QTVAVGVIK[+281.2]NVEK	46.2
K[+281.2]KELAQVLLQK	46.37
GSISLK[+281.2]ELNAR	46.57
ATK[+281.2]GIVEHDFVIK	46.62
K[+281.2]IGNVEVPK	46.65
AYIK[+281.2]IYQGEDLPHPK	46.75
K[+281.2]DLLEDK	46.75
TVAHAGM[+16.0]VGFPNAGK[+281.2]SSLLR	47.12
LK[+281.2]DIAGEFK	47.25
QVLDK[+281.2]LQVER	47.25
K[+281.2]FYEAFSK	47.3
AVILIGGPQK[+281.2]GTR	47.35
VAVGNQPADIGYK[+281.2]IK	47.8
YELTGK[+281.2]FER	47.85
EELDTLLNHPDIK[+281.2]HR	48.07
LLVPK[+281.2]ESYVK	48.08
INVYYNEATGNK[+281.2]YVPR	48.08
SK[+281.2]LLPLEEHYR	48.12
TK[+281.2]LLPLEEHYR	48.21
GASIVEDK[+281.2]LVK	48.21
TSK[+281.2]AEELLAEEK	48.4
ISGASEK[+281.2]DIVHSGLAYTM[+16.0]ER	48.59
INVYYNEAAGNK[+281.2]YVPR	48.59
VVLIGDSGVGK[+281.2]	48.81
MGGK[+281.2]DFSFR	48.87
LLVGNK[+281.2]SDLTTK	48.9
VEEPSK[+281.2]YGVVVC[+57.0]EADTGR	48.95
ISVYYNEATGGK[+281.2]YVPR	48.95
INVYYNEATGGK[+281.2]YVPR	49.08
ELITPK[+281.2]GGGGGGPGEGFDVAK	49.31
FK[+281.2]C[+57.0]IASTYYR	49.58
K[+281.2]ELAAVC[+57.0]GDPSTDPPLLTR	49.86
SPVVTIM[+16.0]GHVDHGK[+281.2]TTLLDK	49.97
NMSVIAHVDHGK[+281.2]STLTDSLVC[+57.0]K	50
VVLNK[+281.2]ADQVDTQQLMR	50.32
TSEVPYAGINIGPVHKK[+281.2]	50.41
QSFLLK[+281.2]R	50.66
K[+281.2]FM[+16.0]ADC[+57.0]PHTIGVEFGTR	50.7
K[+281.2]YM[+16.0]LSVDNLK	50.73
NINEK[+281.2]QISQVLK	50.82
TFK[+281.2]GVVDVVM[+16.0]K	50.94
VLVLGDSGVGK[+281.2]	50.96
QYK[+281.2]DVAKPVIELYK	51.01
FK[+281.2]TITTAYYR	51.15
DVAKPVIELYK[+281.2]SR	51.34
LNAK[+281.2]EIVLK	51.56
TVVTGIEM[+16.0]FHK[+281.2]SLER	51.57
PM[+16.0]EVFM[+16.0]C[+57.0]SVLK[+281.2]R	51.67
K[+281.2]LLEGNFAK	51.78
GSALEMEFK[+281.2]R	51.78
FIK[+281.2]TPEYLHIDQR	52
K[+281.2]VPIIVVGC[+57.0]K	52.05
PPGIYK[+281.2]GDYLK	52.11
LISVLNK[+281.2]STGEVTK	52.16
VVLNK[+281.2]ADMVETQQLM[+16.0]R	52.19
MITIDGK[+281.2]QIK	52.33
IGAFGYMEC[+57.0]SAK[+281.2]TK	52.33
AVHEK[+281.2]VNIIPVIGK	52.47
LC[+57.0]TFILK[+281.2]NPPENSDSGTGKK	52.6
M[+16.0]IQHAVFK[+281.2]ELVK	52.67
DVNAAIATIKTK[+281.2]	52.78
SLPLLENQIK[+281.2]ETHQR	52.79
K[+281.2]VLPITVPK	52.81
VLSK[+281.2]IFGNK	52.88
LIEK[+281.2]LDIK	52.93
K[+281.2]FVLC[+57.0]PEC[+57.0]ENPETDLHVNPK	52.93
DVNAAIATIK[+281.2]TK	53.06
DVFESK[+281.2]LSTR	53.14
DVNAAIATIK[+281.2]TKR	53.43
YILK[+281.2]DYVSGK	53.45
FDFLC[+57.0]QYHK[+281.2]PASK	53.7
EDHK[+281.2]SYYAINTVYVYGQEK	53.89
NK[+281.2]ATEYHLGLLK	53.91
LVLVGDGGTGK[+281.2]TTFVKR	54.23
LSVK[+281.2]LLK	54.24
APIIC[+57.0]VLGHVDTGKTK[+281.2]	54.66
QLIEK[+281.2]M[+16.0]NLSAIQDR	54.97
SQDTVLM[+16.0]NLYK[+281.2]R	54.99
K[+281.2]KELVNNLAEIYGR	55.07
FYEAFSK[+281.2]NLK	55.12
GADDAM[+16.0]ESSK[+281.2]PGPVQVVLVQK	55.25
FK[+281.2]QDSNHTIGVEFGSR	55.35
K[+281.2]LTPITYPQGLAM[+16.0]AK	55.53
LK[+281.2]IDFGEAAR	55.62
M[+58.0]FSALK[+281.2]K	55.89
IGAFGYMEC[+57.0]SAKTK[+281.2]	55.99
VIISNSAYGK[+281.2]FR	56.26
SLDDEVNAFK[+281.2]QR	56.36
FVSNLYNQLAK[+281.2]TK	56.58
SC[+57.0]GSSTPDEFPTDIPGTK[+281.2]GNFK	56.97
TTLLYK[+281.2]LK	57.1
TIEIK[+281.2]SITHDIEEK	57.13
K[+281.2]TTVLDVMR	57.4
YATMAFGVQDNLK[+281.2]K	57.46
LK[+281.2]EIDDEFIK	57.46
K[+281.2]LGEFFQTK	57.54
K[+281.2]VLPLEEAYR	57.59
FM[+16.0]QASEDLLK[+281.2]EHYVDLK	57.68
FGK[+281.2]HGGTIPIVPTAEFQDR	57.73
LVLVGDGGTGK[+281.2]TTFVK	57.81
ALQK[+281.2]ALPFK	58.1
AFK[+281.2]ELPVNAQNYVR	58.42
AYHEQLTVAEITNAC[+57.0]FEPANQM[+16.0]VK[+281.2]C[+57.0]DPR	58.42
NLVDNVAK[+281.2]DYVR	58.59
K[+281.2]YMLSVDNLK	58.78
VLVVGDAAVGK[+281.2]TSLVQR	58.83
QVLGLSK[+281.2]LAR	58.92
K[+281.2]IFVLGPK	59.05
VNVNVGVLGHIDSGK[+281.2]TALAR	59.32
ISGASEK[+281.2]DIVHSGLAYTMER	59.38
FNDK[+281.2]HITTLQASFLTK	59.46
YLEANM[+16.0]TQSALPK[+281.2]IIK	59.51
VK[+281.2]LQIWDTAGQER	59.6
VEAQVYILSK[+281.2]EEGGR	59.66
SILAEYK[+281.2]IHNADVTLR	59.74
SFEVIK[+281.2]VIHGK	59.77
TM[+16.0]EDTLMTVK[+281.2]QYEAAR	59.83
IK[+281.2]LQVWDTAGQER	59.87
K[+281.2]IAILGYR	60.01
VC[+57.0]LLGDTGVGK[+281.2]SSIVC[+57.0]R	60.06
VIILGDSGVGK[+281.2]TSLM[+16.0]NQYVNKK	60.19
GADDAMESSK[+281.2]PGPVQVVLVQK	60.27
GIAGEK[+281.2]FDIVK	60.41
VIILGDSGVGK[+281.2]TSLM[+16.0]NQYVNK	60.56
TIK[+281.2]AQIWDTAGQER	60.83
GVLK[+281.2]VGQEIEVRPGIVSK	60.89
VGAK[+281.2]LLFR	60.97
VGK[+281.2]STLIQC[+57.0]LIR	60.98
K[+281.2]LINFM[+16.0]K[+281.2]	61.03
K[+281.2]AGPVQVLIVK	61.04
DVNAAIAAIK[+281.2]TK	61.08
M[+16.0]GGIK[+281.2]GLFK	61.16
ETITK[+281.2]PPK	61.3
VQIPIM[+16.0]LVGNKK[+281.2]	61.38
WQIFK[+281.2]TSATK	61.52
LNIK[+281.2]FVPAEAR	61.52
EEFRPTIYSNVIK[+281.2]GM[+16.0]R	61.53
AK[+281.2]DHGLEVLGLVR	61.98
IIVIGDSNVGK[+281.2]TC[+57.0]LTYR	62.07
QYIEK[+281.2]SLLVPDHVITR	62.46
AK[+281.2]LAIWDTAGQER	62.48
EQGQAPITPQQGQALAK[+281.2]QIHAVR	62.62
TTLLHMLK[+281.2]DDR	62.62
IIK[+281.2]PLQYQSTVASGTVAR	62.8
ALELDSNNEK[+281.2]GLFR	62.87
K[+281.2]C[+57.0]PFIVALNK	62.89
ETITAPVPFDFTHK[+281.2]K	63.42
K[+281.2]ELPTVVFR	63.63
KFSNQYK[+281.2]ATIGADFLTK	63.63
SK[+281.2]LQSQLLSLEK	63.77
QPDLEHALK[+281.2]C[+57.0]LQR	64.26
DVAK[+281.2]PVIELYK	64.52
NK[+281.2]LQSQLLSIEK	64.53
IESFVETLK[+281.2]R	64.59
SVTDSIRDEYAFLQKK[+281.2]	65
GHLLK[+281.2]QVLQIQK	65
GEHSIVYLK[+281.2]PSYAFGSVGK	65.14
AK[+281.2]WFPEVR	65.28
ISAFGYLEC[+57.0]SAK[+281.2]TK	65.28
K[+281.2]PVSIVSPEPGTTR	65.36
SQDTVLMNLYK[+281.2]R	65.55
K[+281.2]EC[+57.0]EHC[+57.0]DC[+57.0]LQGFQLTHSLGGGTGSGM[+16.0]GTLLISK	65.62
ISAFGYLEC[+57.0]SAKTK[+281.2]	65.69
VAPSAVLGPNVSIGK[+281.2]GVTVGEGVR	65.91
FGK[+281.2]HGGTIPIVPTAEFQDSISGASEK	66.05
IDQLQEELLHTQLK[+281.2]YQR	66.18
VVLIGDSGVGK[+281.2]SNLLSR	66.18
NILDEIK[+281.2]K	66.18
LDDNEALIEK[+281.2]LK	66.24
QAHELAK[+281.2]SYGIPFIETSAK	66.32
IVLIGNAGVGK[+281.2]TC[+57.0]LVR	66.32
GIHEYDFEIK[+281.2]NVPFK	66.59
TVTSALK[+281.2]ELYR	66.73
AYHEQLTVAEITNAC[+57.0]FEPANQMVK[+281.2]C[+57.0]DPR	66.79
TVEAFLK[+281.2]EAAR	66.92
PLEVFM[+16.0]C[+57.0]SVLK[+281.2]R	66.98
GHYTIGK[+281.2]EIVDLVLDR	67.01
VTLAQTAVPVLC[+57.0]GSALK[+281.2]NK	67.28
GHYTIGK[+281.2]EIIDPVLDR	67.34
K[+281.2]GDALVVAQLAGVQAAK	67.75
DK[+281.2]FSFDLGK	67.81
AVLLVGLC[+57.0]DSGK[+281.2]	67.89
GITVK[+281.2]AQTASLFYNC[+57.0]EGK	68.02
FNTPQQPK[+281.2]K	68.17
LLLLGAGESGK[+281.2]STIVK	68.3
K[+281.2]DVFFYQADDEHYIPR	68.39
IK[+281.2]LQLWDTAGQER	68.51
EK[+281.2]EITIINPAQFPDK	68.65
K[+281.2]TYDLLFK	68.65
GDVVPK[+281.2]DVNAAIATIK	68.71
ESFNPESYELDK[+281.2]SFR	68.86
LSVLAVDPSSC[+57.0]TSGGSLLGDK[+281.2]TR	68.98
K[+281.2]LAPITYPQGLALAK	68.98
TPQDPSSVLK[+281.2]K	69.08
FMQASEDLLK[+281.2]EHYVDLK	69.24
TIGGGDDSFNTFFSETGAGK[+281.2]HVPR	69.26
SFQDYLGK[+281.2]IHGAYSSEK	69.4
GLVGSK[+281.2]SLSR	69.48
DLYLENPEIK[+281.2]IR	69.94
NEEK[+281.2]AQR	69.94
EIDSVK[+281.2]YLEC[+57.0]SALTQR	70.49
VTK[+281.2]FAENQGTPLLVIANK	70.63
SIYYITGESK[+281.2]EQVANSAFVER	70.63
TGYNVK[+281.2]QLFR	70.71
K[+281.2]KEPELFQTVAEGLR	70.85
AGYNVK[+281.2]QLFR	70.97
VIIGTK[+281.2]TILANGALR	71.18
K[+281.2]ANLQQAIVTPLKPVDNTYYK	71.29
NVK[+281.2]FNVWDVGGQDK	71.4
DM[+16.0]GTVVLGK[+281.2]LESGSIC[+57.0]K	71.46
GVGIK[+281.2]STPVTVVLPDTK	71.93
SYGIPFIETSAK[+281.2]TR	72.22
TMEDTLMTVK[+281.2]QYEAAR	72.77
FVDK[+281.2]LYTGLIQGQR	72.94
LNIWDVGGQK[+281.2]SLR	73.1
GLLTILKK[+281.2]	73.65
FQVDK[+281.2]VNFHM[+16.0]FDVGGQR	73.67
DK[+281.2]VM[+16.0]PLIIQGFK	73.73
VK[+281.2]DGQLTVGLVGYPNVGK	74
LLLIGDSGVGK[+281.2]TC[+57.0]LIIR	74.04
ETQVILLDTPGIISPGK[+281.2]QK	74.14
ITTHFELK[+281.2]HLSSGDLLR	74.18
SATGNSILGQPVFESK[+281.2]LR	74.2
GK[+281.2]EFEFSQLPLK	74.55
LVLQK[+281.2]DDK	74.87
AIPIK[+281.2]QGILLK	75.18
IDLLDDSC[+57.0]IKNEEAEALAK[+281.2]R	75.37
SIQVDGK[+281.2]TIK	75.49
VK[+281.2]ETELELK	75.49
ALC[+57.0]YLK[+281.2]LC[+57.0]QFEEAK	75.51
GDVVPK[+281.2]DVNAAIAAIK	75.51
GPMSMK[+281.2]EVDEQMLAIQSK	75.51
DLPNALDEK[+281.2]QLIEK	75.67
EIGAVK[+281.2]YLEC[+57.0]SALTQR	75.98
ASIPFSVVGSNQLIEAK[+281.2]GK	76.12
NYEASVDSLTFSVVTGPAPSQEAGTK[+281.2]AR	76.13
K[+281.2]AILVVFANK	76.33
VIILGDSGVGK[+281.2]TSLMNQYVNK	76.39
FSNQYK[+281.2]ATIGADFLTK	76.39
VTLAQTAVPVLC[+57.0]GSALKNK[+281.2]	76.52
KLTPITYPQGLAM[+16.0]AK[+281.2]EIGAVK	76.91
SC[+57.0]LLLQFTDK[+281.2]R	76.94
K[+281.2]DITAALAAER	77.2
LLM[+16.0]LGLDNAGK[+281.2]TTILK	77.22
AGSEGLQQVVGM[+16.0]K[+281.2]K	77.26
VVLLGAPNAGK[+281.2]STLSNQLLGR	77.29
SGDAAIVEM[+16.0]VPGK[+281.2]PM[+16.0]C[+57.0]VESFSQYPPLGR	77.47
FEK[+281.2]ISNIIK	77.8
VVLLGEGC[+57.0]VGK[+281.2]TSLVLR	77.84
QLASEDISHITPTQGFNIK[+281.2]SVQSQGFK	77.9
VITFIDLAGHEK[+281.2]YLK	77.98
TIGGGDDSFNTFFSETGAGK[+281.2]	78.04
FGAGTLK[+281.2]SLHYD	78.11
VETGVLK[+281.2]PGM[+16.0]VVTFAPVNVTTEVK	78.18
AIELGYNPVK[+281.2]VNC[+57.0]VVMR	78.5
EIISFGSGYGGNSLLGK[+281.2]K	78.53
EIISFGSGYGGNSLLGKK[+281.2]	78.53
LK[+281.2]LTGFPYK	78.94
LVFLGEQSVGK[+281.2]TSLITR	78.94
SGK[+281.2]LVFLGLDNAGK	78.94
LVLLGSGSVGK[+281.2]SSLALR	79.43
K[+281.2]IIENELEGFGIR	79.55
LLLLGTGESGK[+281.2]STFIK	79.69
LIVIGDSTVGK[+281.2]SC[+57.0]LIR	79.76
DPNVVGQLAK[+281.2]QM[+16.0]IGYNLATK	79.83
TGK[+281.2]LVFLGLDNAGK	79.9
QIK[+281.2]LQIWDTAGQESFR	80.45
SFTPVFLGSALK[+281.2]NK	80.65
TPLEPPPIVVVVM[+16.0]GPPK[+281.2]VGK	80.72
DLHFK[+281.2]M[+16.0]FDVGGQR	80.72
QEYVLTQQGFIYQGSAK[+281.2]FIK	80.78
LLTNFLPLK[+281.2]GQK	80.92
ILLLGAGESGK[+281.2]STFLK	81.06
VVVVGDQSAGK[+281.2]TSVLEM[+16.0]IAQAR	81.27
QYPWGTVQVENEAHC[+57.0]DFVK[+281.2]LR	81.32
FNVWDTAGQEK[+281.2]FGGLR	81.33
VLTSGIFETK[+281.2]FQVDK	82.07
TLLLC[+57.0]GYPNVGK[+281.2]SSFINK	82.17
QDLPNAM[+16.0]NAAEITDK[+281.2]LGLHSLR	82.86
SQAPGISLPGVLVGNK[+281.2]TDLAGR	83.05
GK[+281.2]VVDLLAQDADIVC[+57.0]R	83.26
NKPK[+281.2]TVIYWLAEVK	83.88
SFENISK[+281.2]WLR	83.94
IIVIGDSNVGK[+281.2]TC[+57.0]LTFR	83.98
VITFIDLAGHEKYLK[+281.2]	84.12
FLALGDSGVGK[+281.2]TSVLYQYTDGK	84.56
KGK[+281.2]SFLM[+16.0]DFM[+16.0]LR	85.2
TK[+281.2]IIPYFEALK	85.25
IVVLGDGASGK[+281.2]TSLTTC[+57.0]FAQETFGK	85.31
YIIIGDM[+16.0]GVGK[+281.2]SC[+57.0]LLHQFTEK	85.68
IYADTFGDINYQEFAK[+281.2]R	85.77
VLLLGAPGVGK[+281.2]SALAR	85.89
LVLLGESAVGK[+281.2]SSLVLR	85.94
NWVK[+281.2]ELQR	86.17
AK[+281.2]EELIFHC[+57.0]GFR	86.35
DVQK[+281.2]FLVEC[+57.0]FR	86.48
ELELK[+281.2]VPLVVR	86.73
GFPVLLHYQTVSEPAVIK[+281.2]R	87.01
ETQVILLDTPGIISPGKQK[+281.2]	87.39
VGVVGLPNVGK[+281.2]SSLINSLK	87.44
NALK[+281.2]QETEVELYNEFPEPIK	87.58
LIADVGLVGFPNAGK[+281.2]SSLLSC[+57.0]VSHAK	87.72
EHYVDLK[+281.2]DRPFFAGLVK	87.79
LGQSVTTIPTVGFNVETVTYK[+281.2]NVK	88.03
LLMLGLDNAGK[+281.2]TTILK	88.13
K[+281.2]LFEAEEQDLFK	88.56
M[+58.0]FSWVSK[+281.2]DAR	88.86
VGLSGPPGAGK[+281.2]STFIEYFGK	88.95
K[+281.2]LNPFGNTFLNR	89.24
LIQQQLEK[+281.2]ELNTLR	89.82
GVEVDPSLIK[+281.2]DTWHQVYR	90.01
NC[+57.0]GK[+281.2]SGVLQALLGR	90.05
ALTVPELTQQVFDAK[+281.2]NM[+16.0]M[+16.0]AAC[+57.0]DPR	90.6
MSPNETLFLESTNK[+281.2]IYK	90.68
VETGVLK[+281.2]PGMVVTFAPVNVTTEVK	91.08
LLLLGPGESGK[+281.2]STFIK	91.25
GK[+281.2]VVDLLATDADIISR	91.35
LLK[+281.2]ASIPFSVVGSNQLIEAK	91.49
LLIIGDSGVGK[+281.2]SSLLLR	91.7
M[+16.0]SSTFIGNSTAIQELFK[+281.2]R	92.11
LTPITYPQGLAMAK[+281.2]EIGAVK	92.18
QDLPNAMNAAEITDK[+281.2]LGLHSLR	92.31
C[+57.0]VVVGDGAVGK[+281.2]TC[+57.0]LLISYTTNK	93.26
ILLLGLDNAGK[+281.2]TTLLK	93.75
LLLIGDSGVGK[+281.2]SC[+57.0]LLLR	93.88
ADVDVQPYAFTTK[+281.2]SLFVGHM[+16.0]DYK	94.91
TAM[+16.0]NVNEIFM[+16.0]AIAK[+281.2]K	95.22
ETPIGLVPK[+281.2]EGALDLSGLR	95.48
IK[+281.2]DLLQQMEEGLK	96.09
LLLIGDSGVGK[+281.2]TC[+57.0]VLFR	96.09
ALTVPELTQQMFDSK[+281.2]	96.24
K[+281.2]FTDFDEVRQEIEAETDR	96.26
LLLIGDSGVGK[+281.2]TC[+57.0]LLC[+57.0]R	96.42
EFPVISVVGYTNC[+57.0]GK[+281.2]TTLIK	96.49
DGK[+281.2]LLPAITILGC[+57.0]R	96.64
SGDAAIVEMVPGK[+281.2]PM[+16.0]C[+57.0]VESFSQYPPLGR	96.93
IQLQPTSIEK[+281.2]EVFPIMAK	97.66
GDYLK[+281.2]ELFR	97.89
VVVVGDQSAGK[+281.2]TSVLEMIAQAR	98.28
GASIVEDK[+281.2]LVEDLR	98.34
WLGLEEAC[+57.0]QLAQFK[+281.2]EM[+16.0]K	98.48
LLALGDSGVGK[+281.2]TTFLYR	98.49
VGVIGFPNVGK[+281.2]SSIINSLK	98.52
DVDHLFQK[+281.2]ELAAQLEK	99.07
LLLLGAGESGKSTIVK[+281.2]	99.33
DTILHDNLK[+281.2]QLMLQ	99.4
AK[+281.2]PYEGSILEADC[+57.0]DILIPAASEK	99.66
IQAEYVSALK[+281.2]LLR	99.67
IGISK[+281.2]SELVAM[+16.0]LEEEELRK	100.1
ADVDVQPYAFTTK[+281.2]SLFVGHMDYK	100.37
DMGTVVLGK[+281.2]LESGSIC[+57.0]K	100.46
SK[+281.2]IEDYFPEFAR	100.55
LK[+281.2]LGQSVTTIPTVGFNVETVTYK	101.58
ALTVPELTQQVFDAK[+281.2]NMM[+16.0]AAC[+57.0]DPR	101.73
FVFHAVK[+281.2]DTILQENLK	101.92
ILIIGESGVGK[+281.2]SSLLLR	102.37
EHGLIFM[+16.0]ETSAK[+281.2]TASNVEEAFINTAK	102.67
C[+57.0]ILAGDPAVGK[+281.2]TALAQIFR	105.28
TVQYQNELHK[+281.2]FLIWDTAGQER	106.02
IGISK[+281.2]SELVAMLEEEELRK	106.83
IQEVADELQK[+281.2]M[+16.0]LLVDELR	107.14
TASNVEEAFINTAK[+281.2]EIYEK	107.2
TAC[+57.0]NVEEAFINTAK[+281.2]EIYR	107.2
DDLC[+57.0]ALAFK[+281.2]VLHDK	107.22
LAPITYPQGLALAK[+281.2]EIDSVK	107.94
WLGLEEAC[+57.0]QLAQFKEMK[+281.2]	108.12
FLNK[+281.2]LIPVLK	108.5
ILM[+16.0]VGLDAAGK[+281.2]TTILYK	108.61
IGISK[+281.2]SELVAM[+16.0]LEEEELR	108.71
VAVVGNVDAGK[+281.2]STLLGVLTHGELDNGR	108.72
ALTVPELTQQMFDSK[+281.2]NMMAAC[+57.0]DPR	109.35
LALGQINIAK[+281.2]NLVDNVAK	111.11
TTLLK[+281.2]QLASEDISHITPTQGFNIK	112.63
LVFLGLDNAGK[+281.2]TTLLHM[+16.0]LK	113.92
IFFVSAK[+281.2]EVLSAR	115.97
GLK[+281.2]M[+16.0]SSTFIGNSTAIQELFK	116.12
LLLIGDSGVGK[+281.2]TC[+57.0]LLFR	116.79
VVLLGDPGVGK[+281.2]TSLASLFAGK	117.07
QNK[+281.2]GIEELFLDLC[+57.0]K	117.1
GLK[+281.2]M[+16.0]ASTFIGNSTAIQELFK	117.28
M[+16.0]AVTFIGNSTAIQELFK[+281.2]R	117.54
IQEVADELQK[+281.2]MLLVDELR	117.8
WLGLEEAC[+57.0]QLAQFK[+281.2]EMK	118.07
VAVLGNVDSGK[+281.2]STLLGVLTQGELDNGR	118.17
GIEELFLDLC[+57.0]K[+281.2]R	118.38
GTHGVIVVYDVTSAESFVNVK[+281.2]R	118.38
EK[+281.2]DNIDITLQWLIQHSK	118.63
QDLPNAM[+16.0]AISEMTDK[+281.2]LGLQSLR	119.14
K[+281.2]FSLPLYFVSAADGTNVVK	119.23
IK[+281.2]LMSELVSNGVQIYQFPTDDDTIAK	119.32
GVGK[+281.2]SAFLQAFLGR	119.61
KVVDNTTAK[+281.2]EFADSLGIPFLETSAK	120.41
HGGTIPIVPTAEFQDSISGASEK[+281.2]DIVHSALAYTM[+16.0]ER	120.83
THINIVVIGHVDSGK[+281.2]STTTGHLIYK	121.19
GHYTIGK[+281.2]EIIDLVLDR	123.38

## Sheet: iRT calibration (BSA)
BSA peptide	iRT	RT (min)
AEFVEVTK	0	48
DAFLGSFLYEYSR	100	119
DLGEEHFK	-11.06	38.5
HLVDEPQNLIK	13.76	58.7
LGEYGFQNALIVR	58.51	93.1
LVTDLTK	-4.9	42.1
QTALVELLK	50.95	88.9
LVNELTEFAK	38.44	79
YLYEIAR	16.96	63.3
DDSPDLPK	-13.05	36
